# Supplementary material
Source: PubMed Central journal article supplement (PMC1863435)
Supplement: pnas_0702225104_1.pdf [file pnas_0702225104_1.pdf]

# Fgf17 Expression

**A**

E9.5  
horiz.

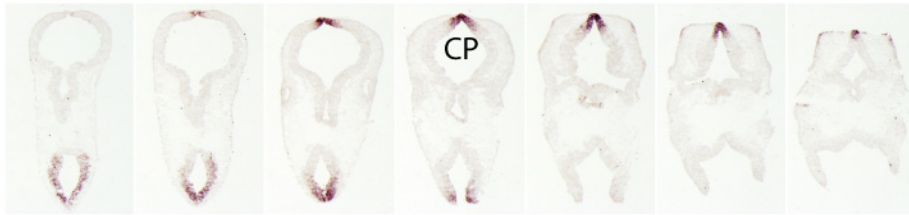

E10.5  
horiz.

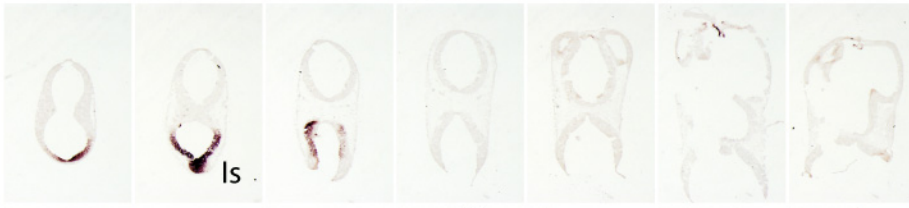

E12.5  
coronal

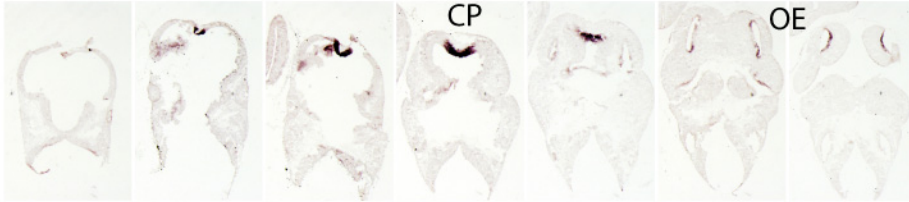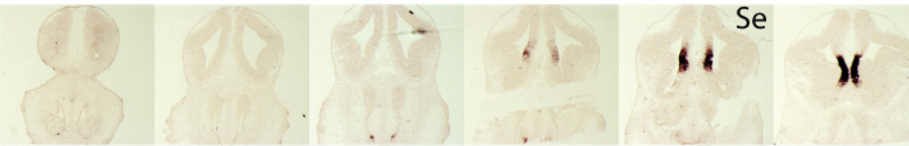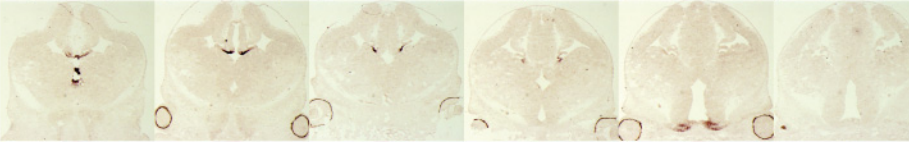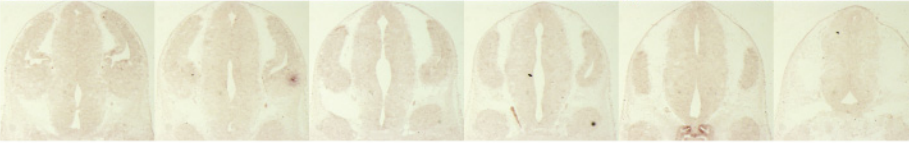

**B**

P0  
coronal

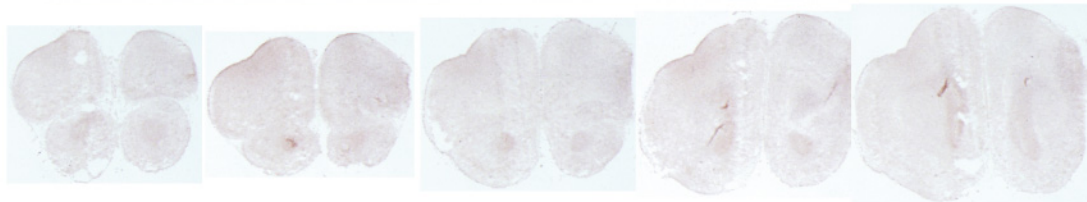

**Fgf17**

**Lmo4**

**Fgf17**

**Lmo4**

P7  
coronal

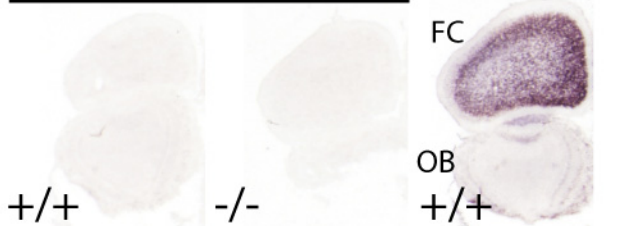

+/+

-/-

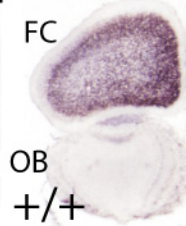

FC

OB

+/+

P8  
sagittal

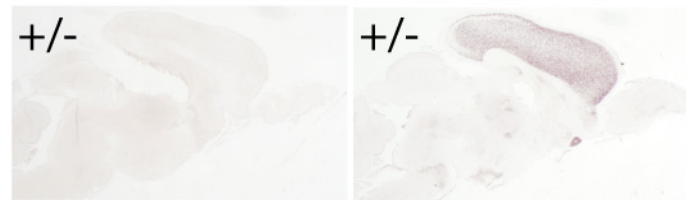

+/-

+/-

-/-

Adult  
coronal

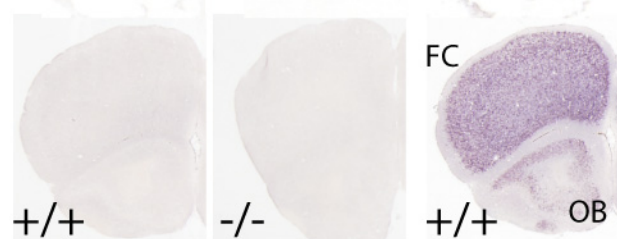

+/+

-/-

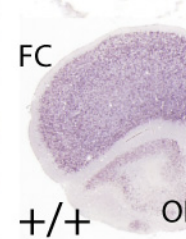

FC

OB

+/+
