# Supplementary material
Source: PubMed Central journal article supplement (PMC1863435)

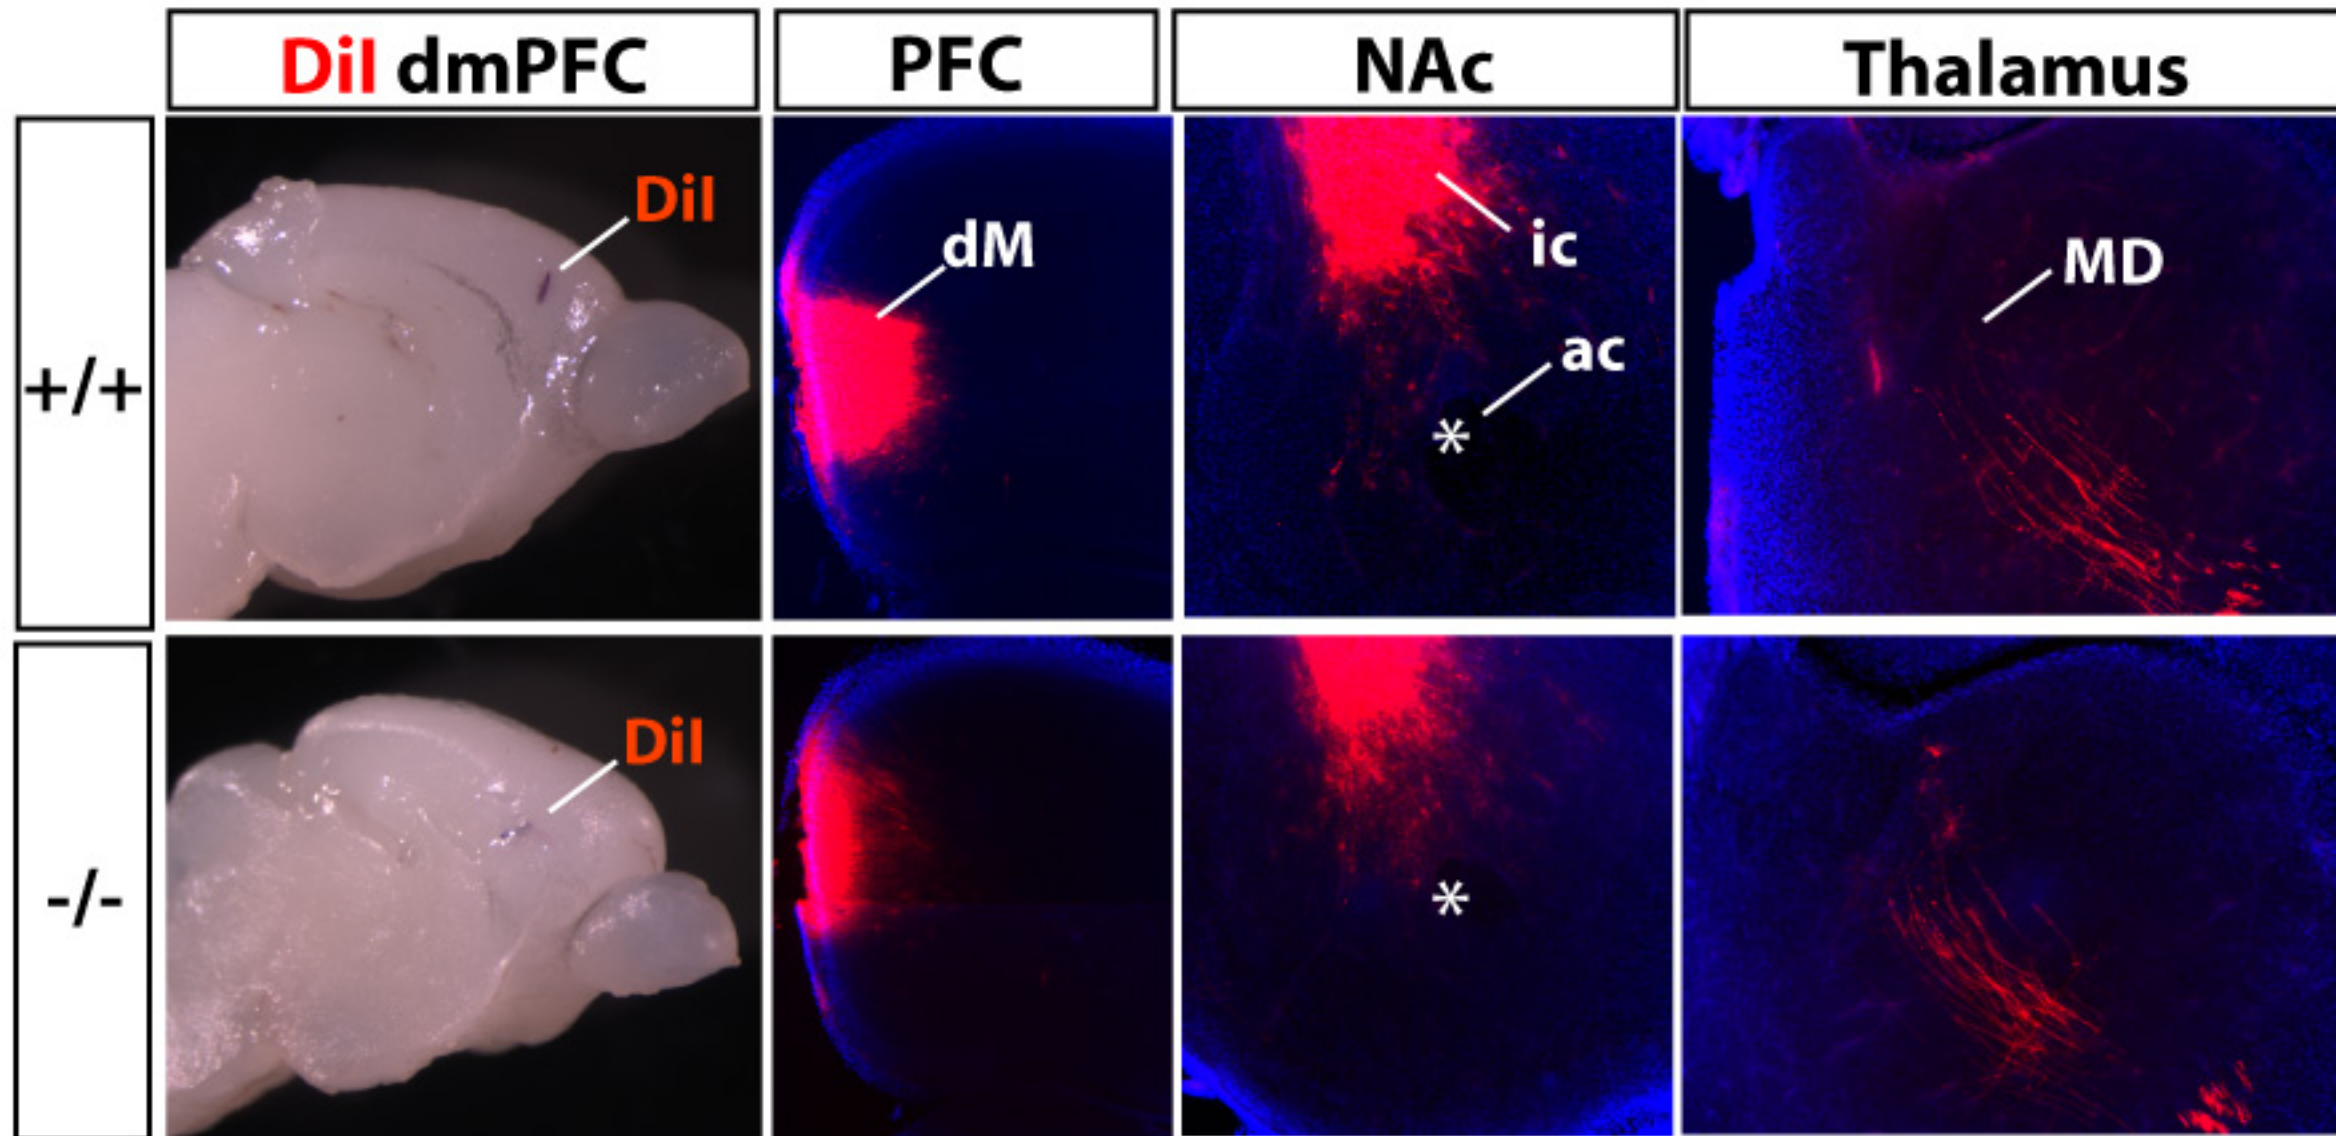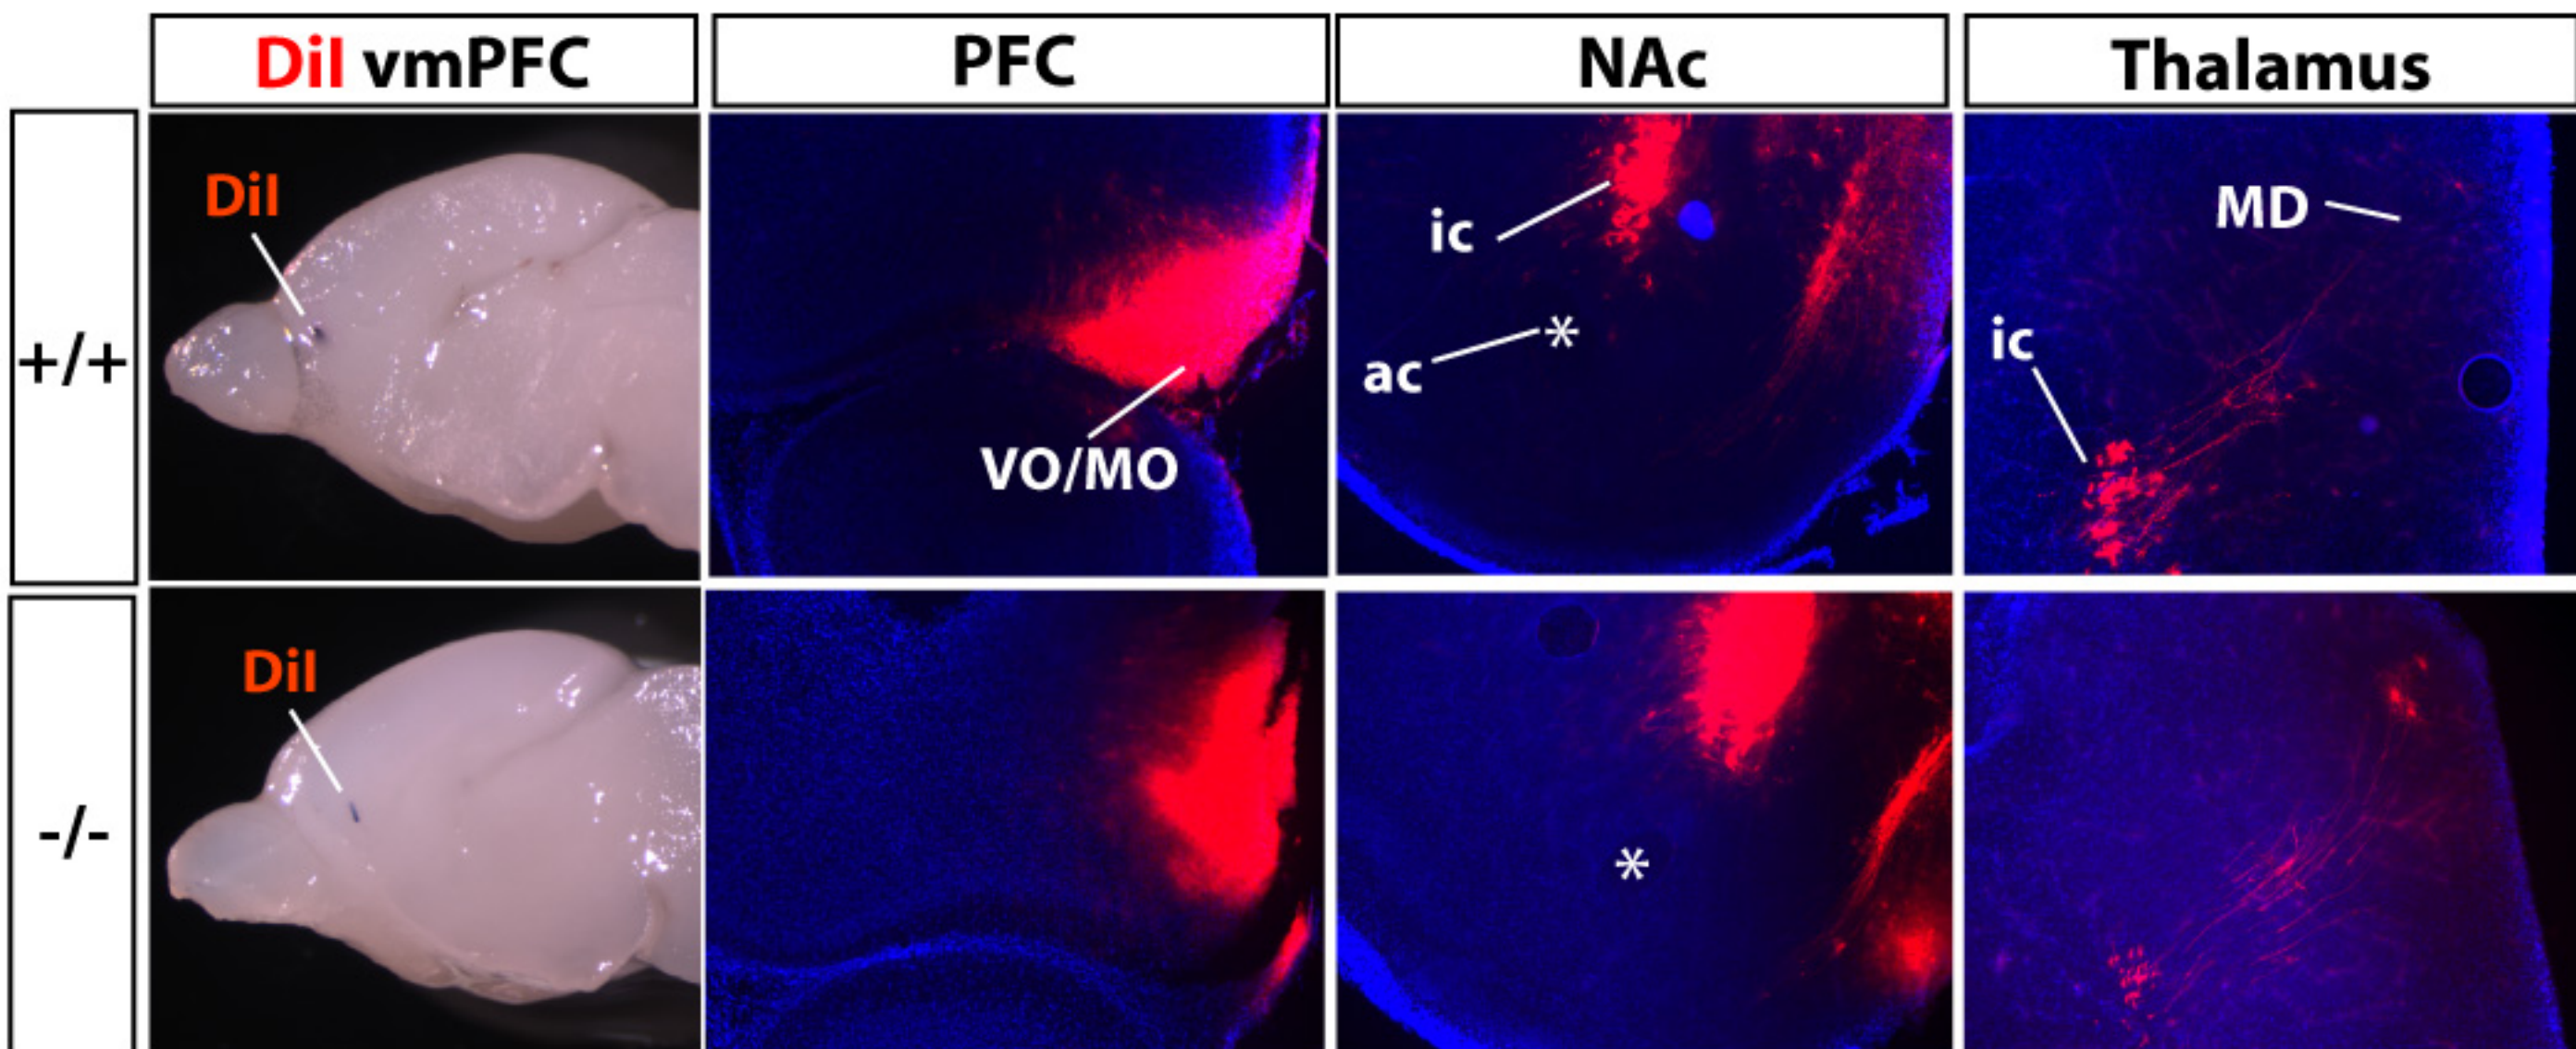

Supplement: pnas_0702225104_10.pdf [file pnas_0702225104_10.pdf]

**+/+****-/-****Dorsal View**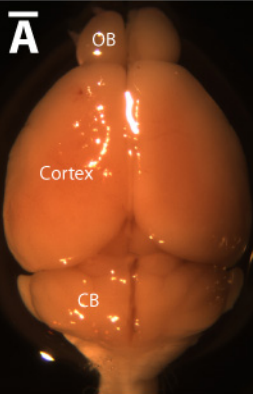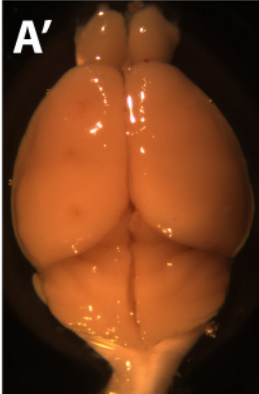**C** Cortex Area (P0)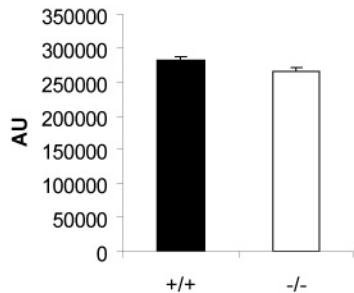**Ventral View**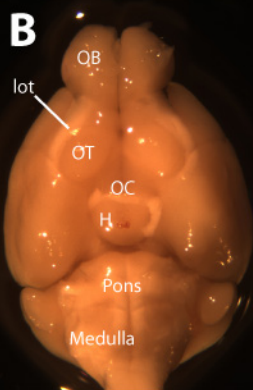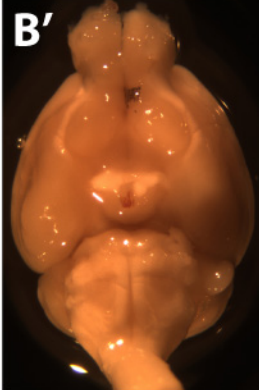**D** Cortex Area (Adult)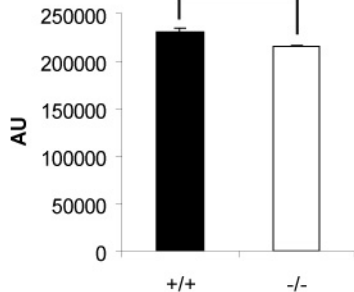

Supplement: pnas_0702225104_2.pdf [file pnas_0702225104_2.pdf]

# Striatum

+/+

-/-

Adult

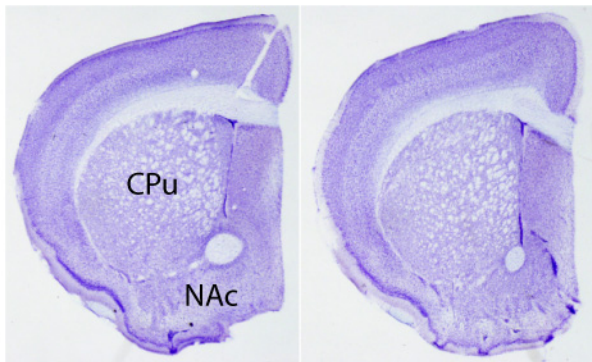

# Olfactory Bulb

+/+

-/-

Adult

Nissl

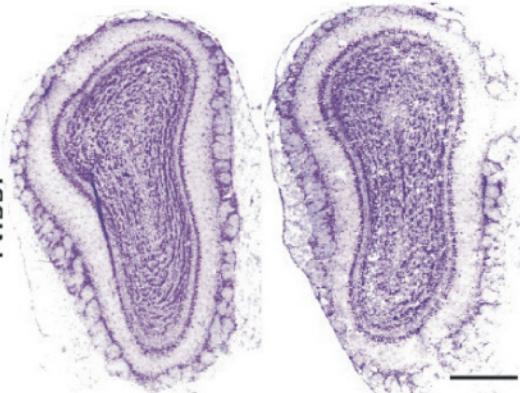

TH

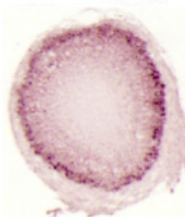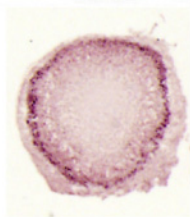

GAD67

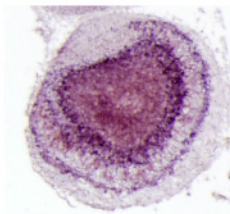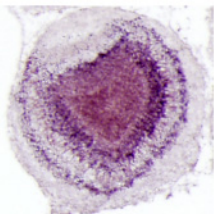

Lmo4

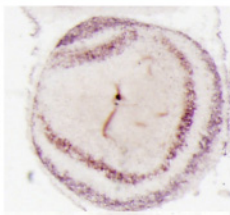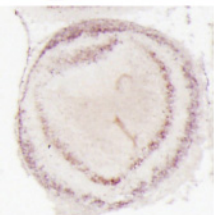

Ngn2

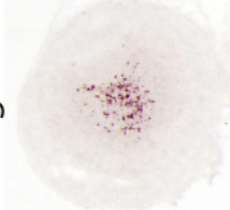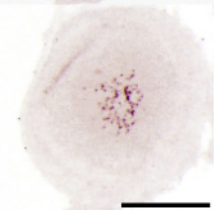

P0

Supplement: pnas_0702225104_3.pdf [file pnas_0702225104_3.pdf]

Wild-type

P0

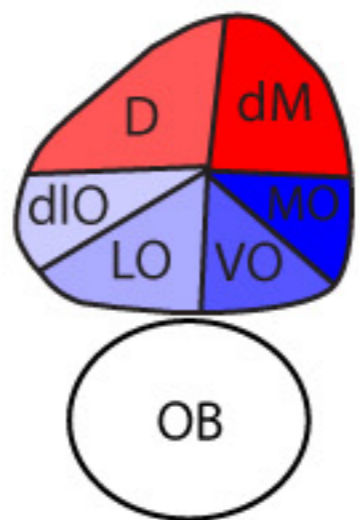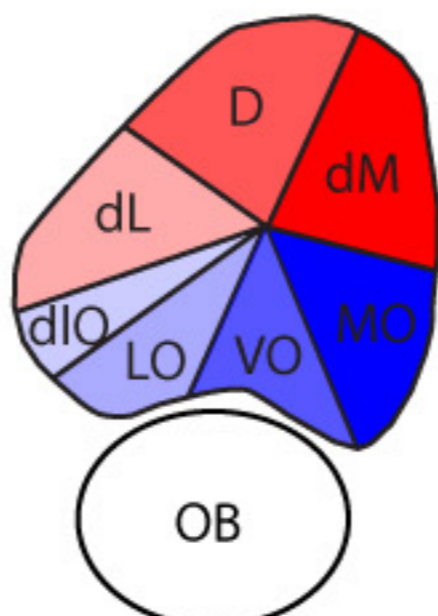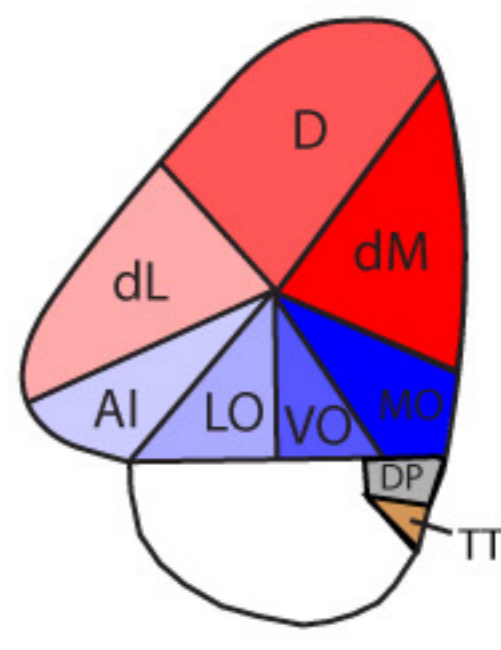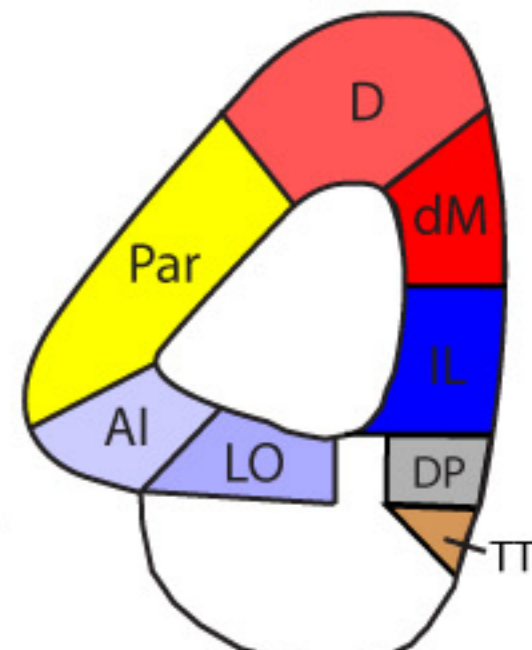

BAC-Drd4

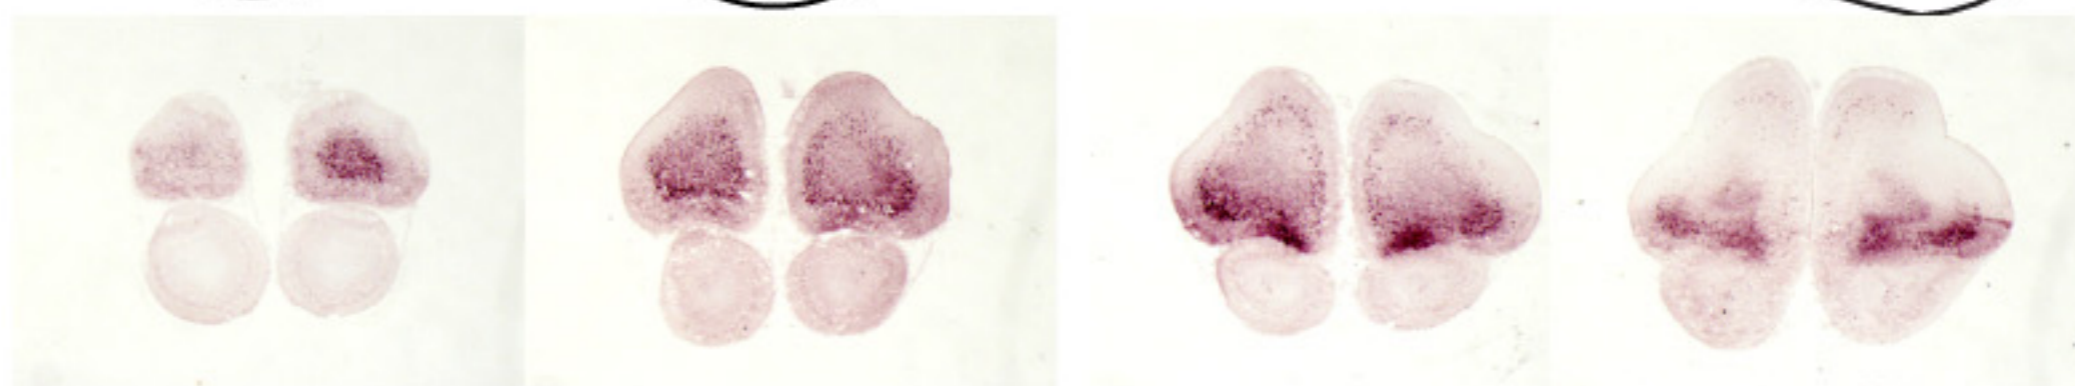

Lmo4

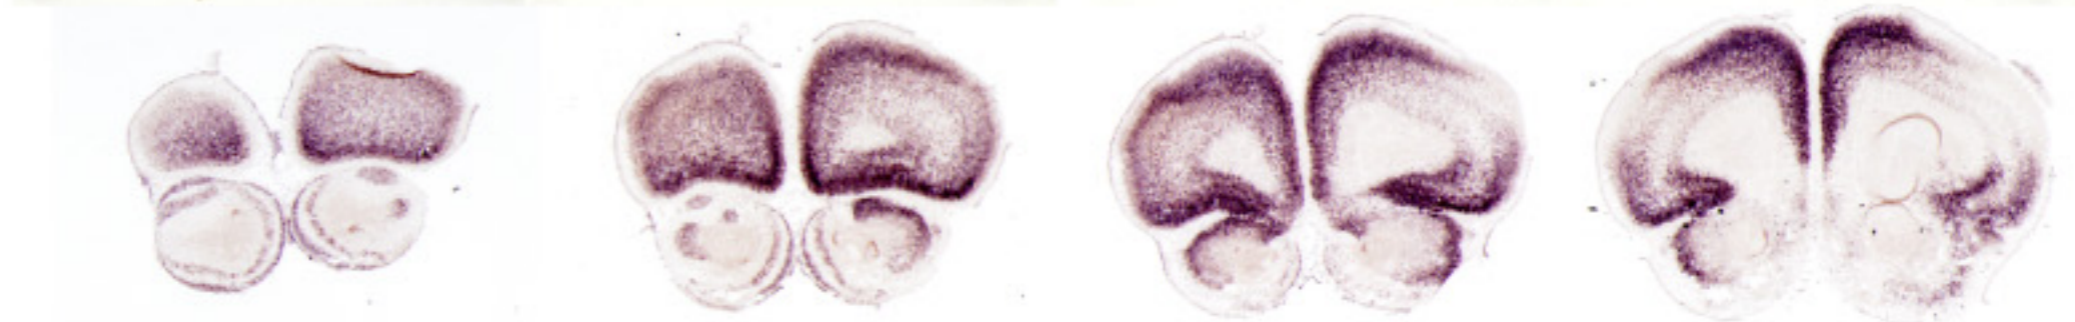

Cad8

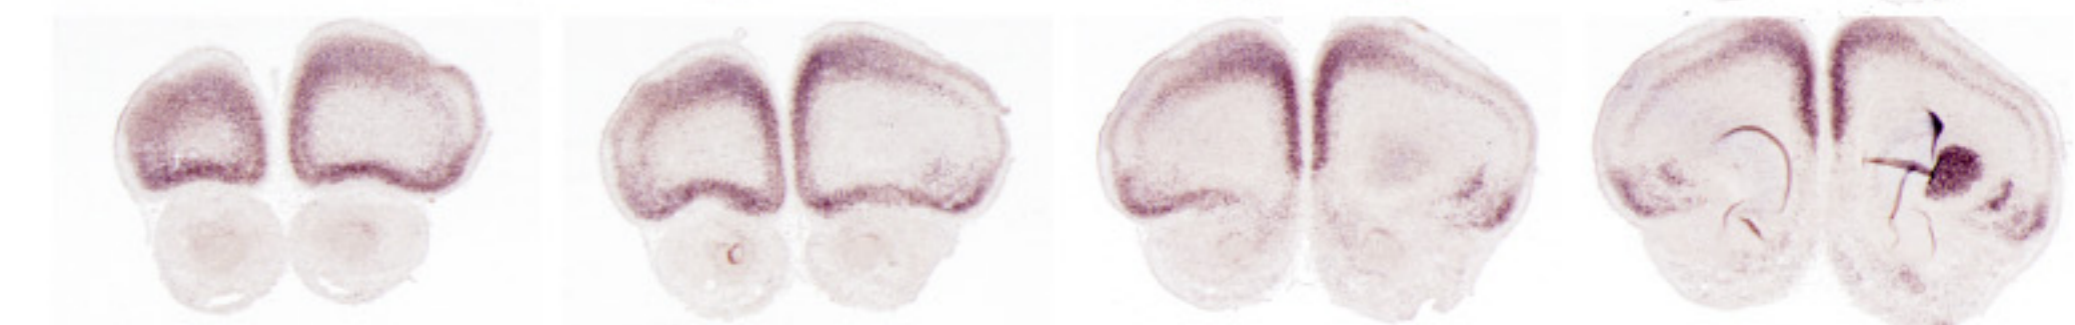

Id2

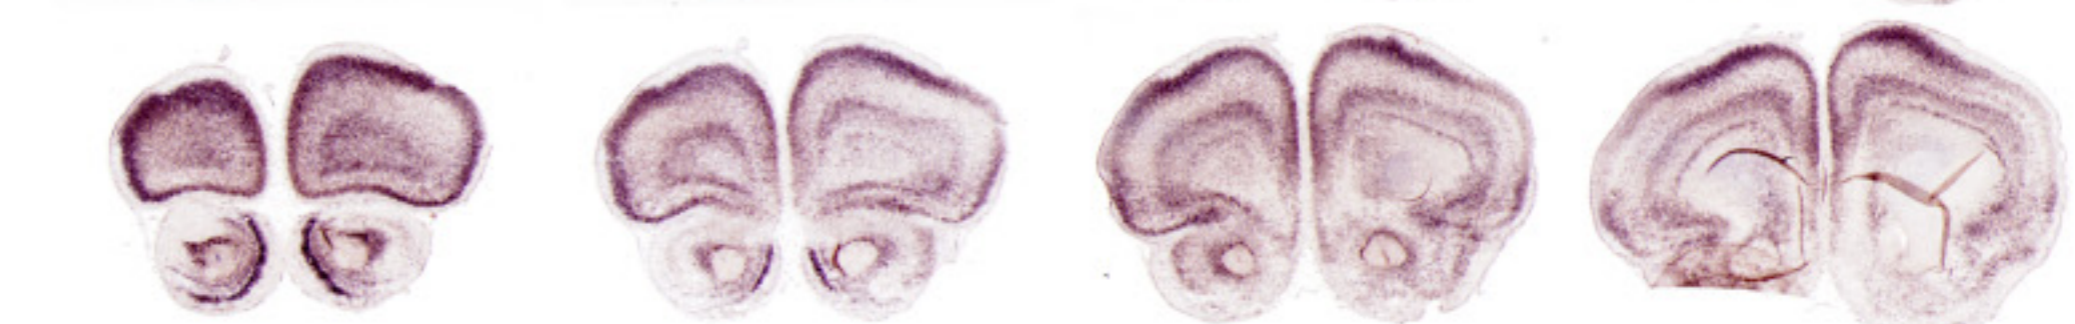

Steel

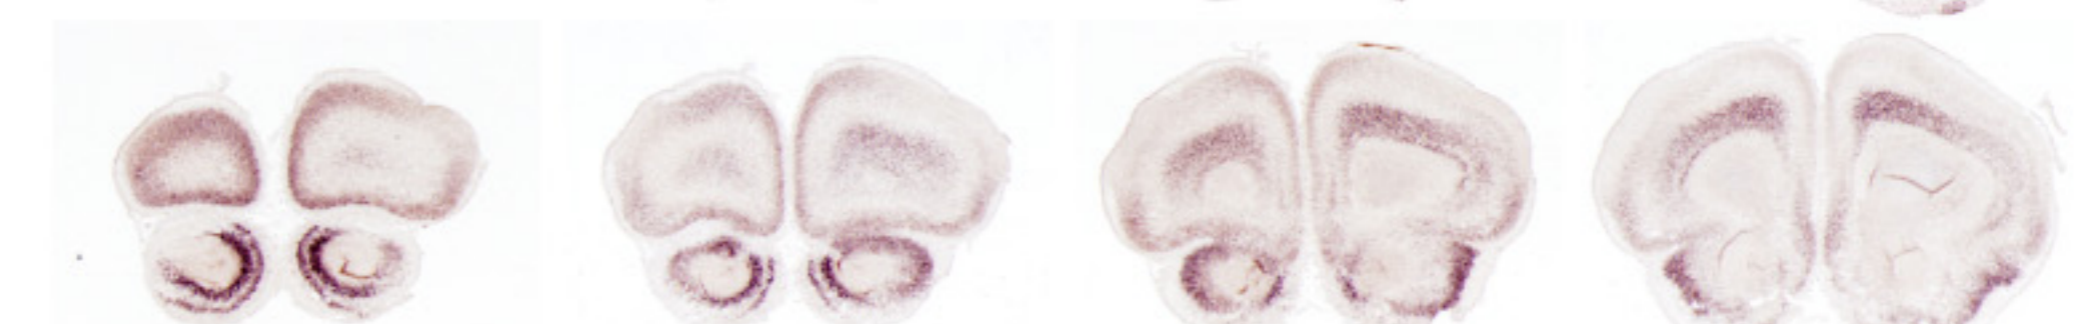

Nt3

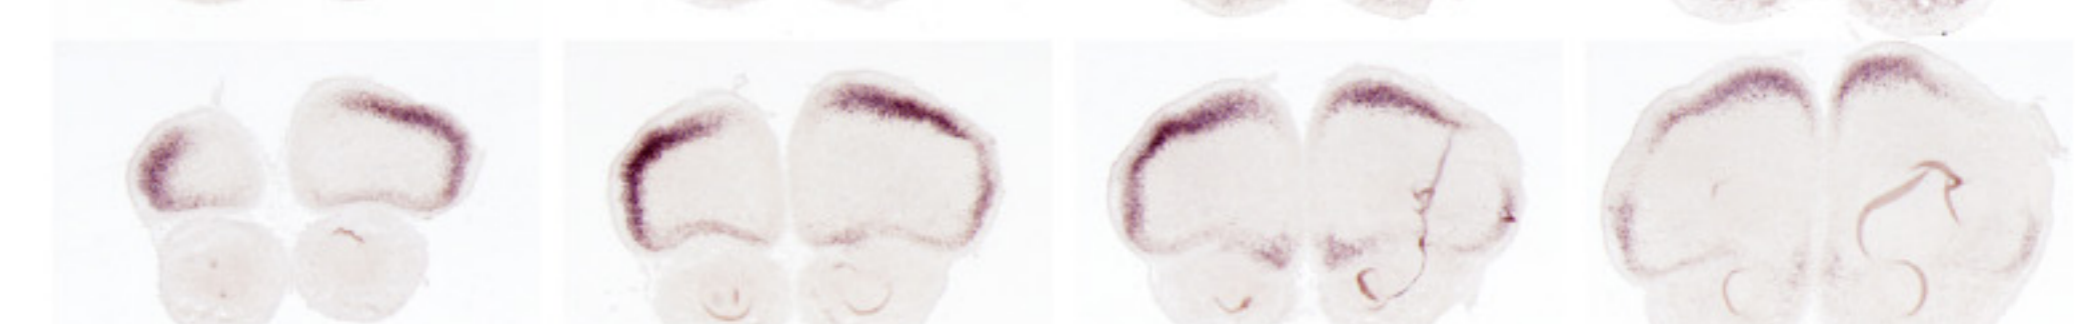

Ngn2

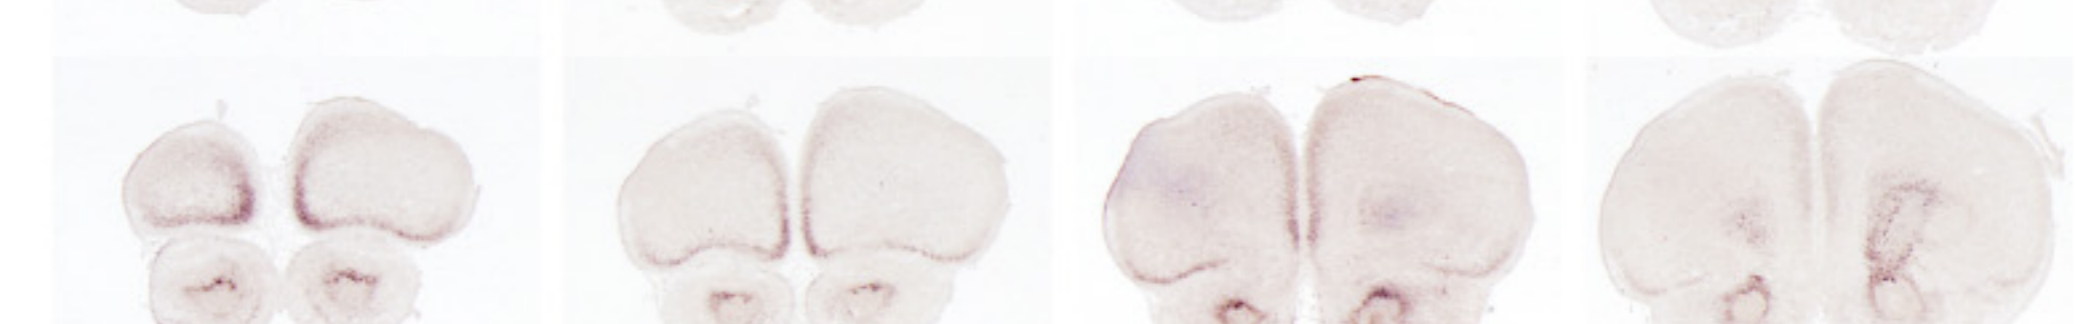

RzrB

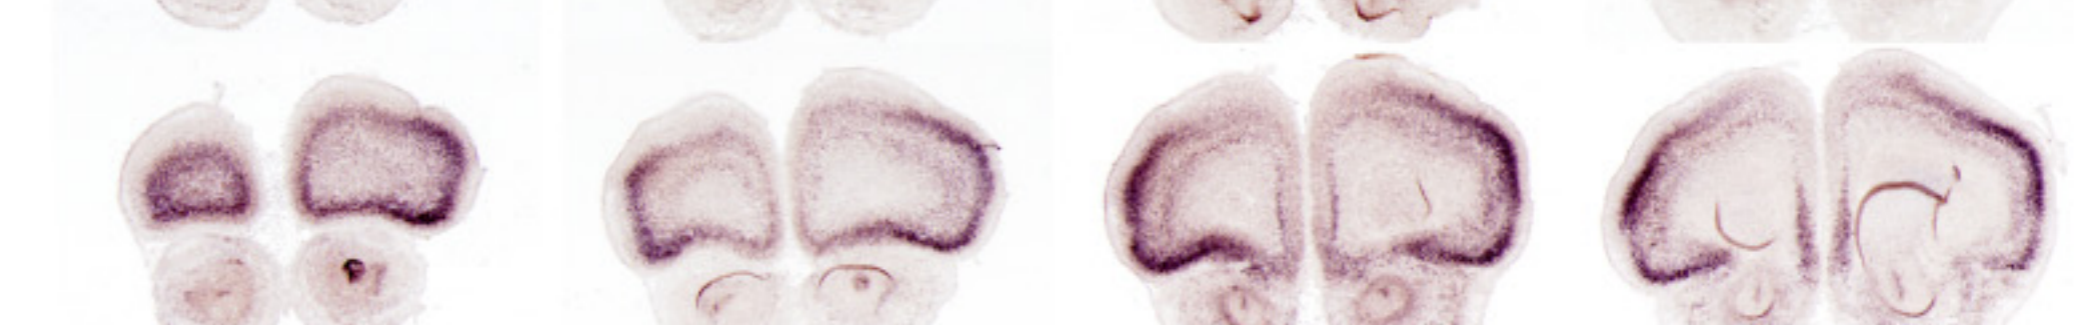

Cad6

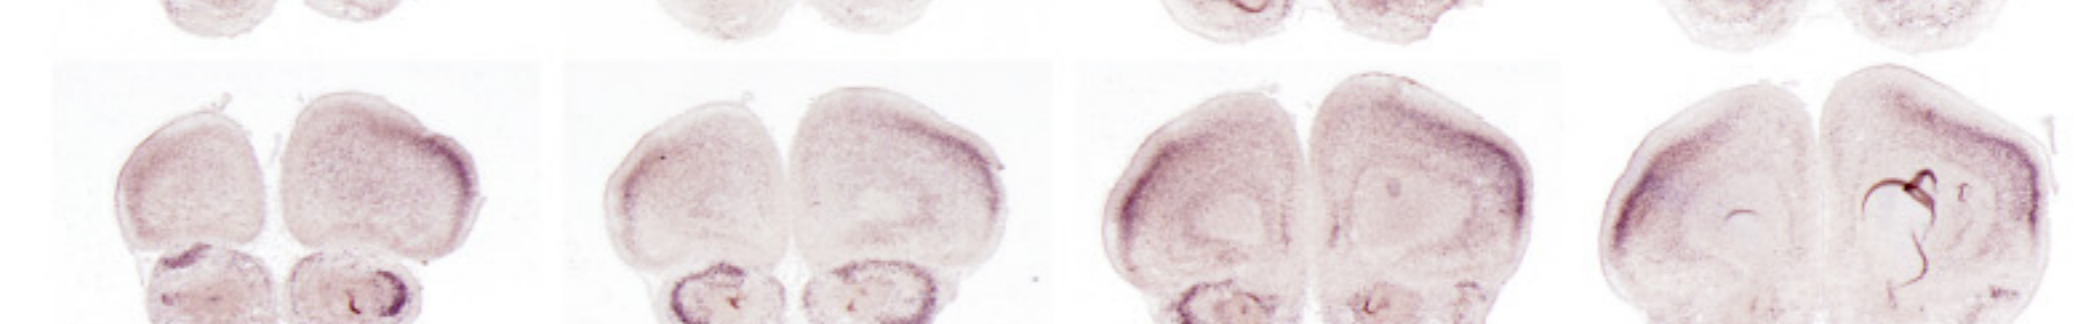

Lmo3

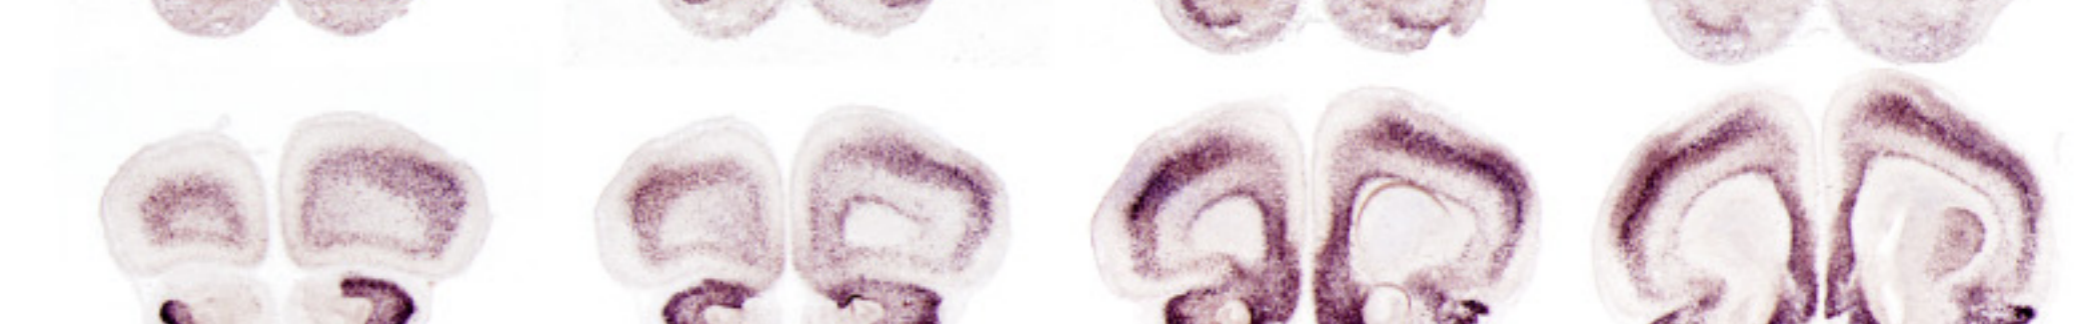

EphrinA5

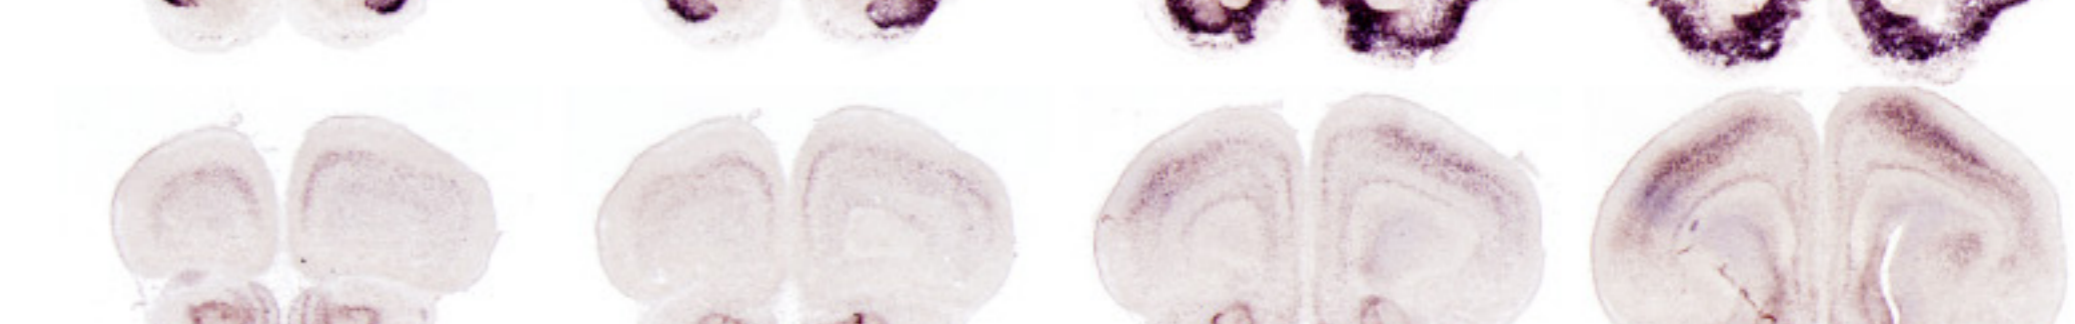

Supplement: pnas_0702225104_4.pdf [file pnas_0702225104_4.pdf]

Fgf17<sup>-/-</sup>

P0

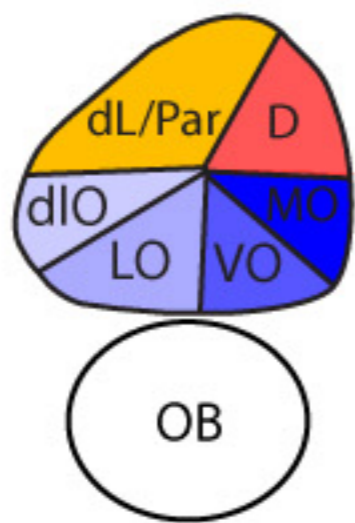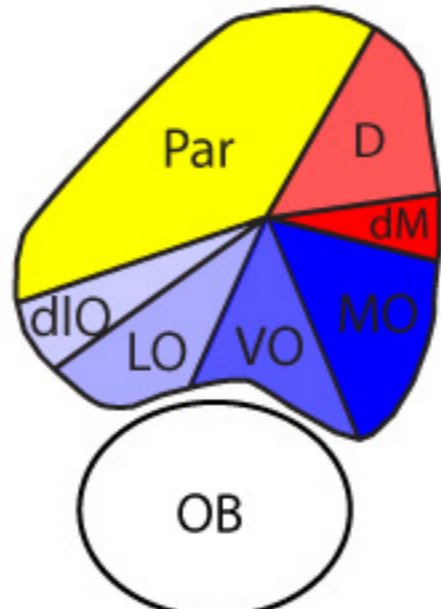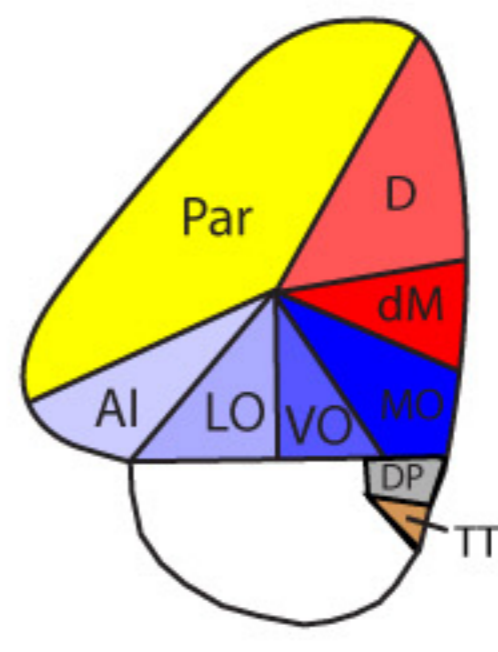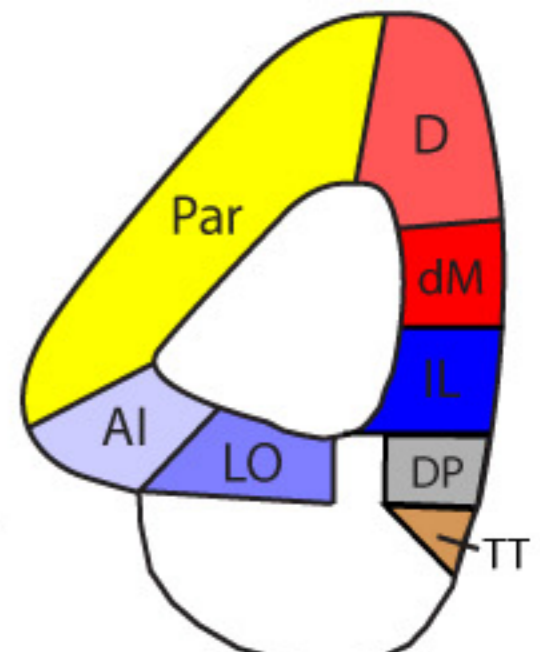

BAC-Drd4

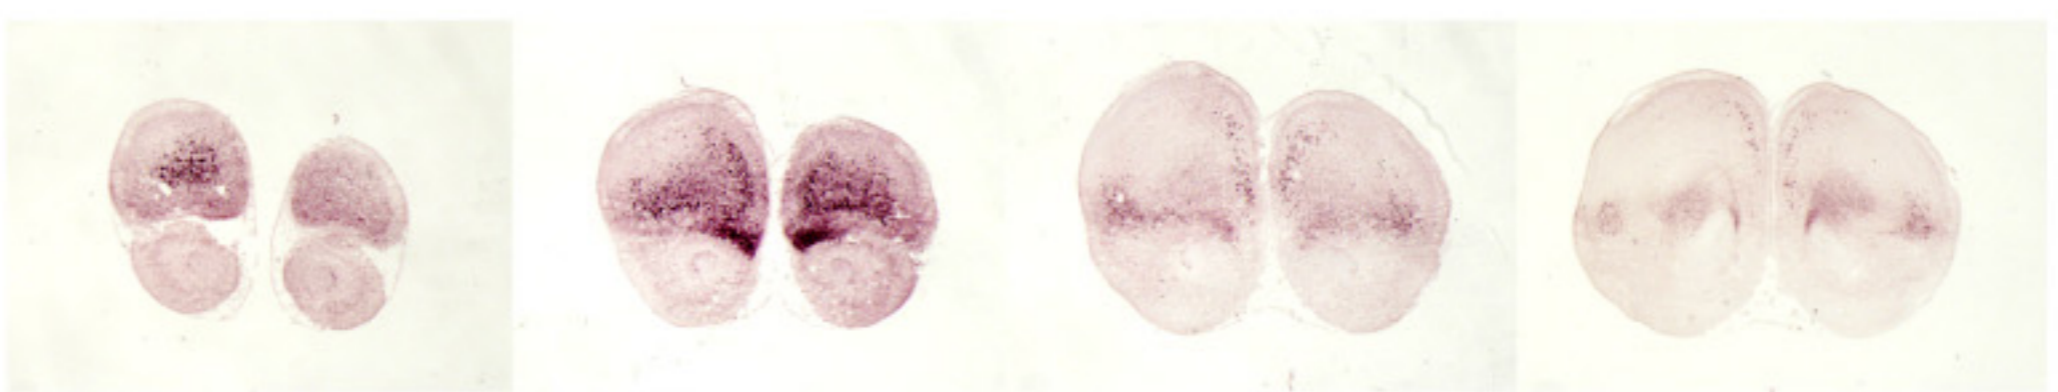

Lmo4

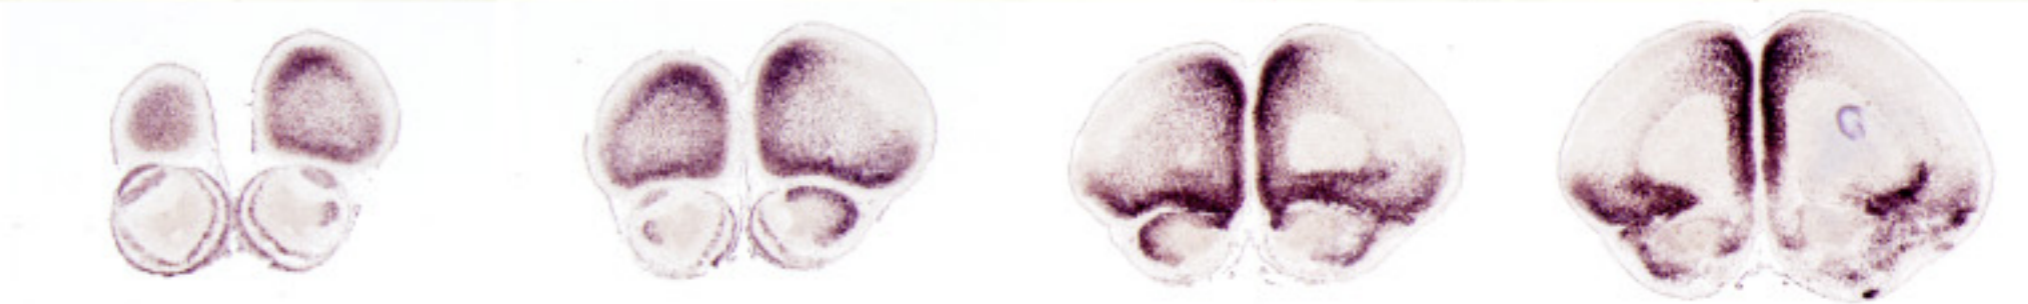

Cad8

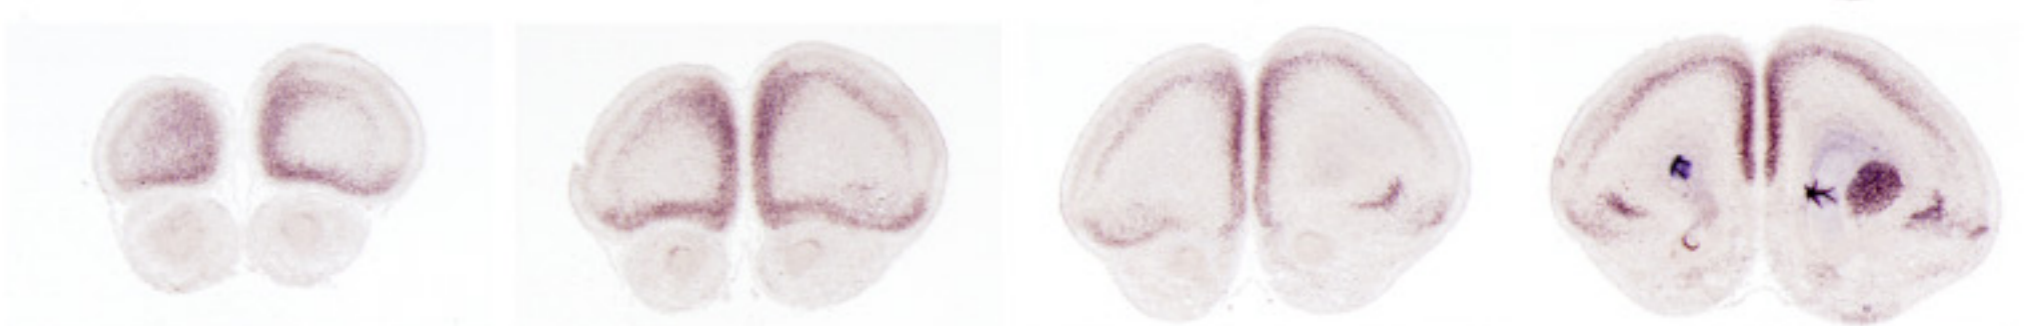

Id2

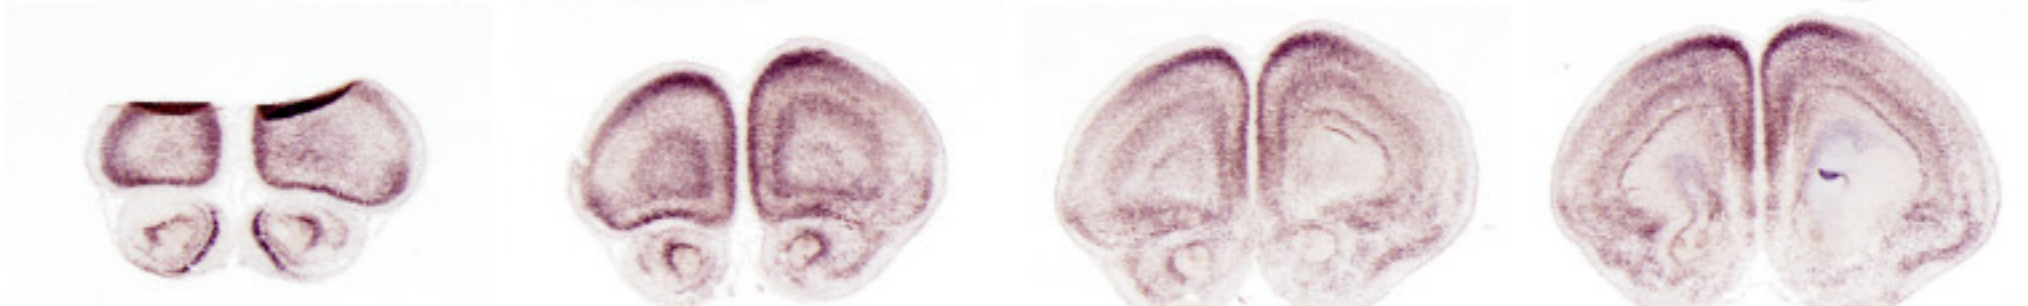

Steel

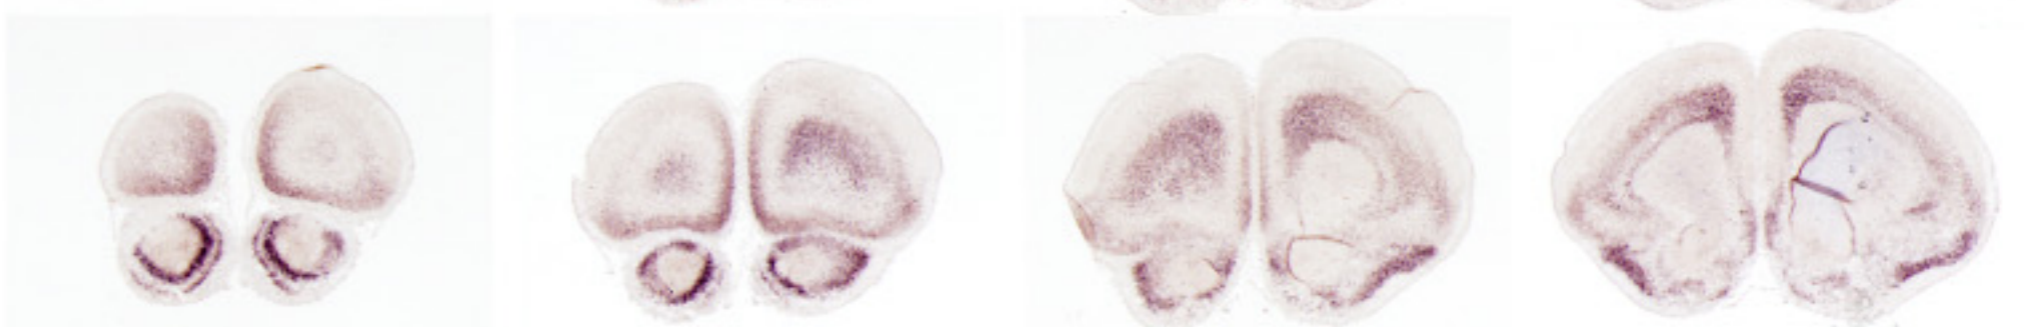

Nt3

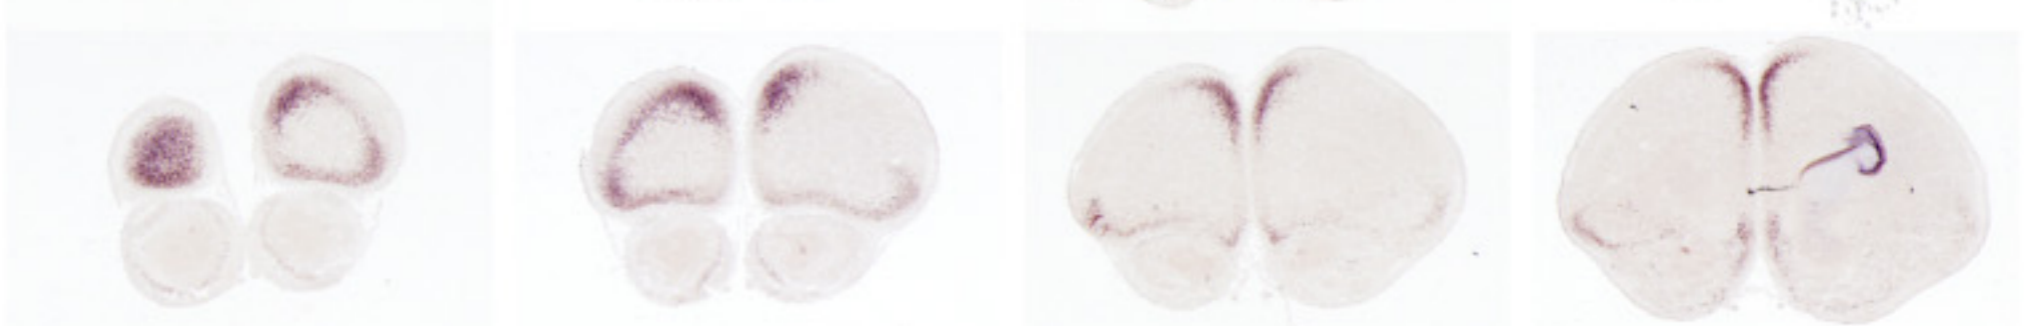

Ngn2

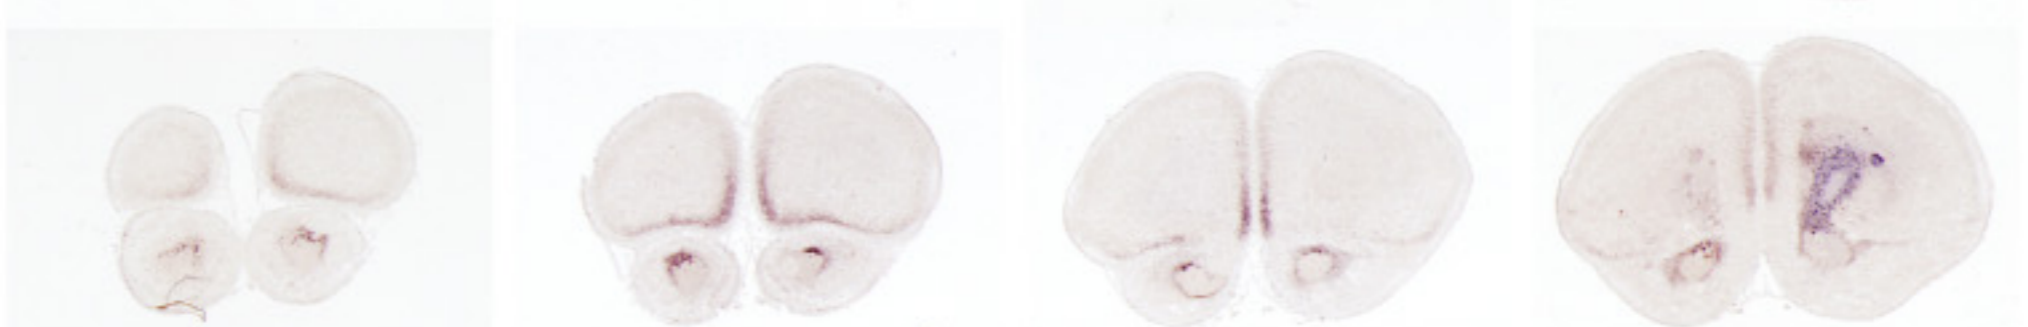

RzrB

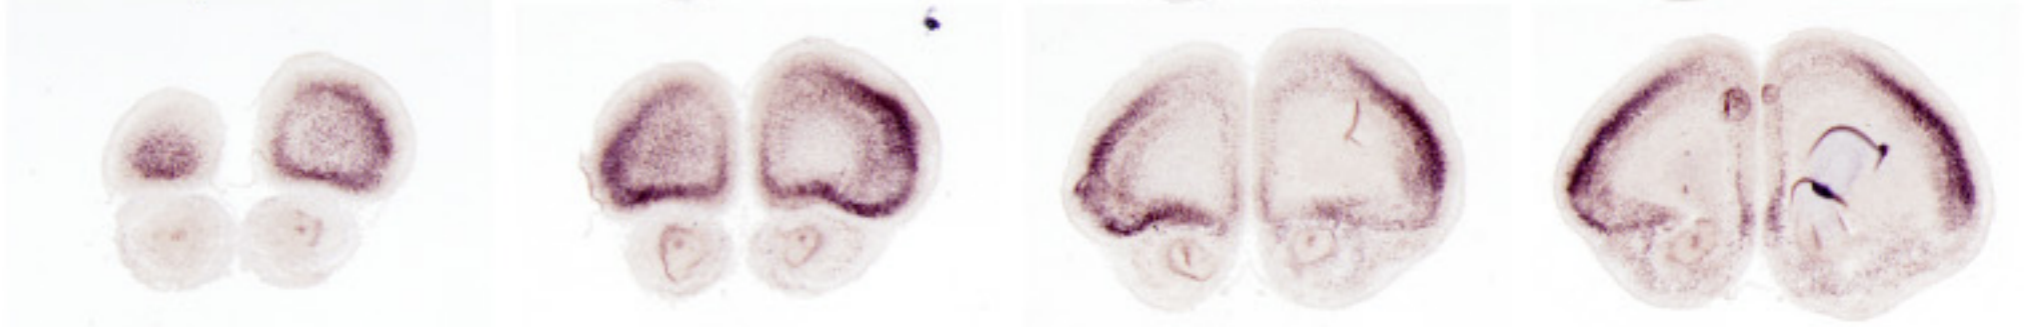

Cad6

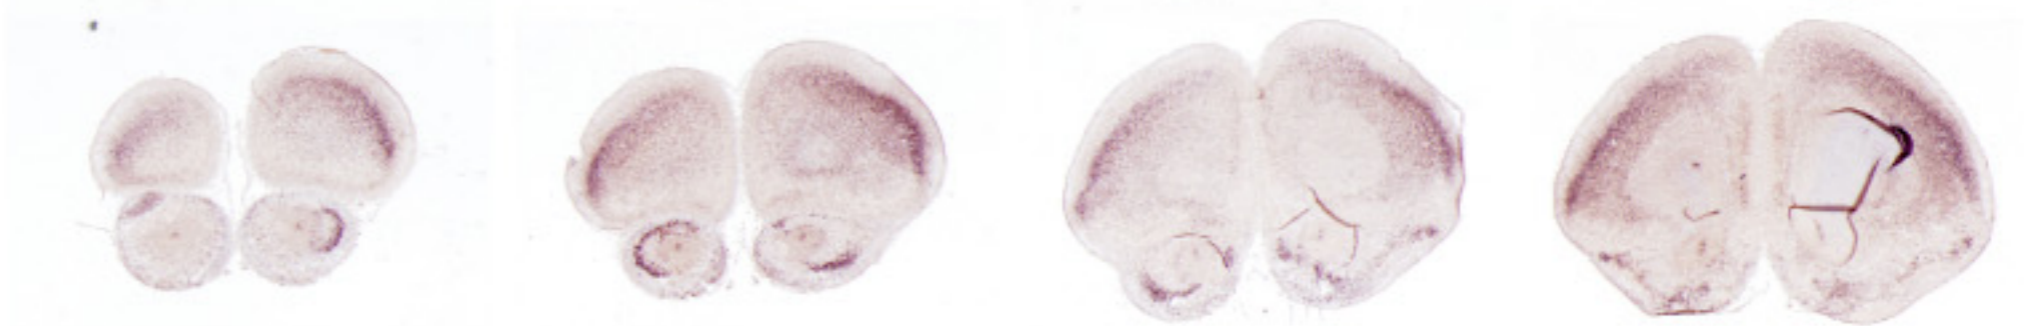

Lmo3

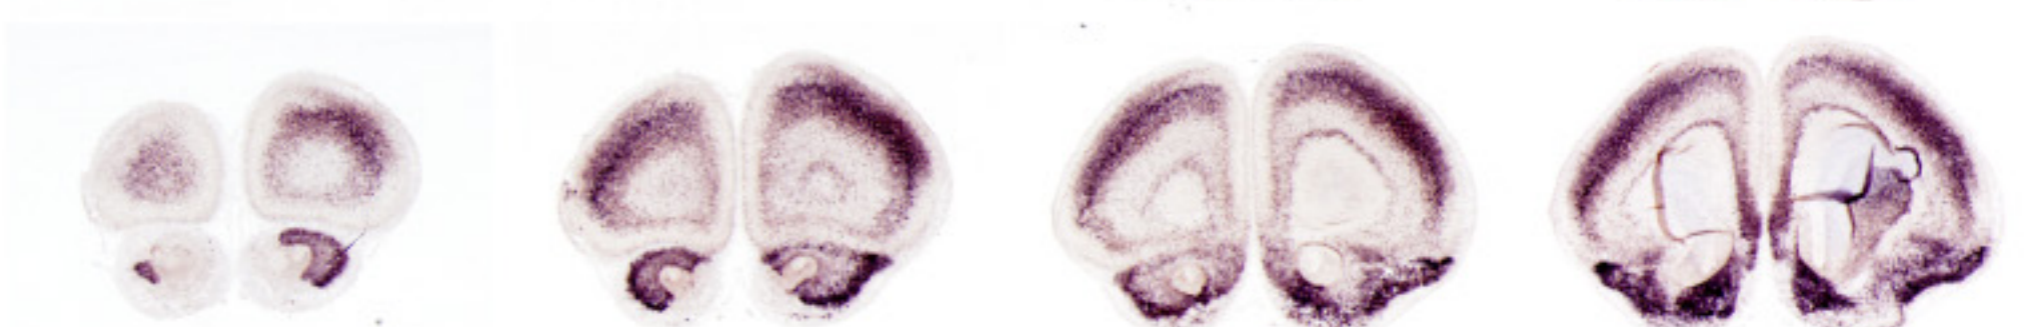

EphrinA5

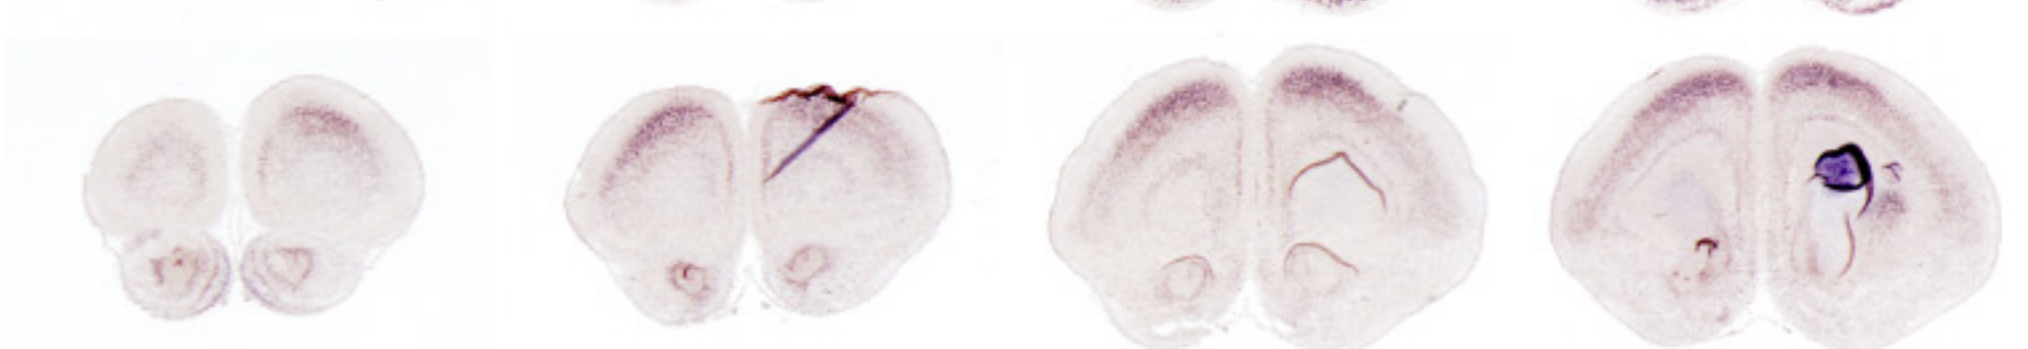

Supplement: pnas_0702225104_5.pdf [file pnas_0702225104_5.pdf]

P0

Lmo4

+/+

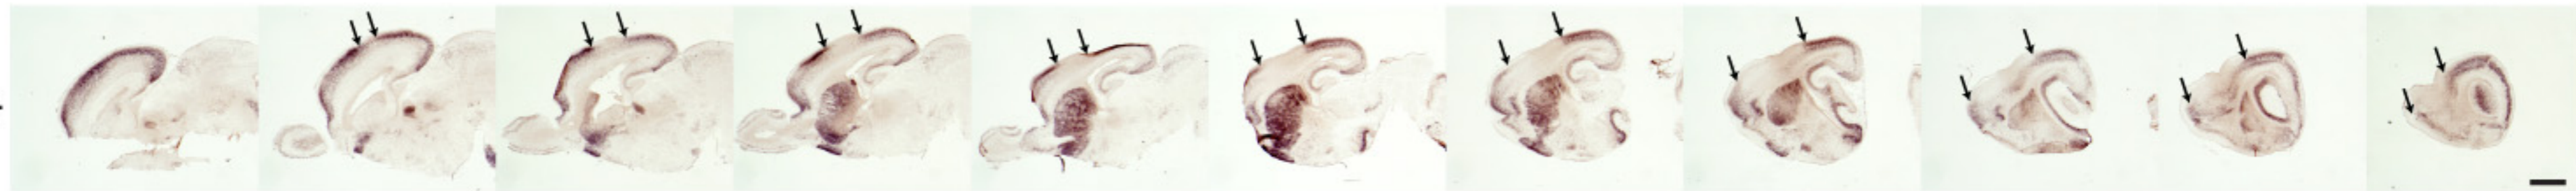

-/-

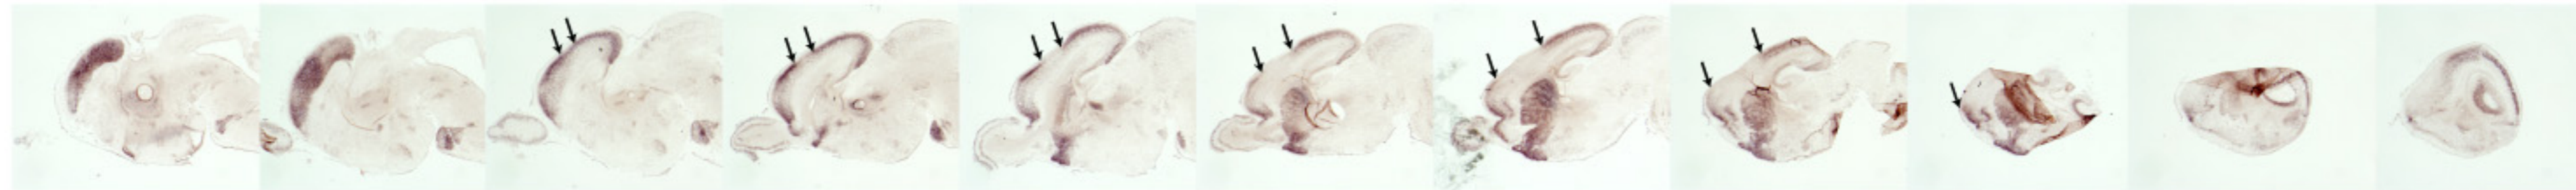

Lmo3

+/+

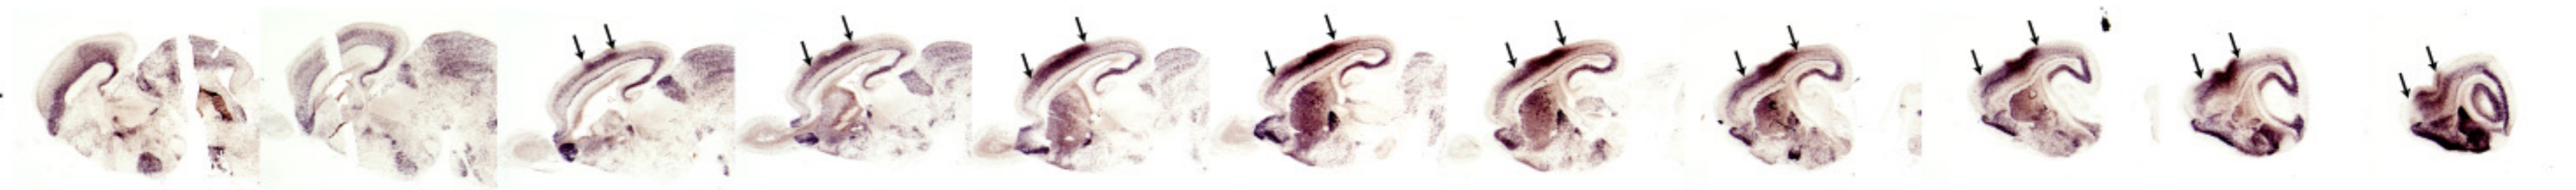

-/-

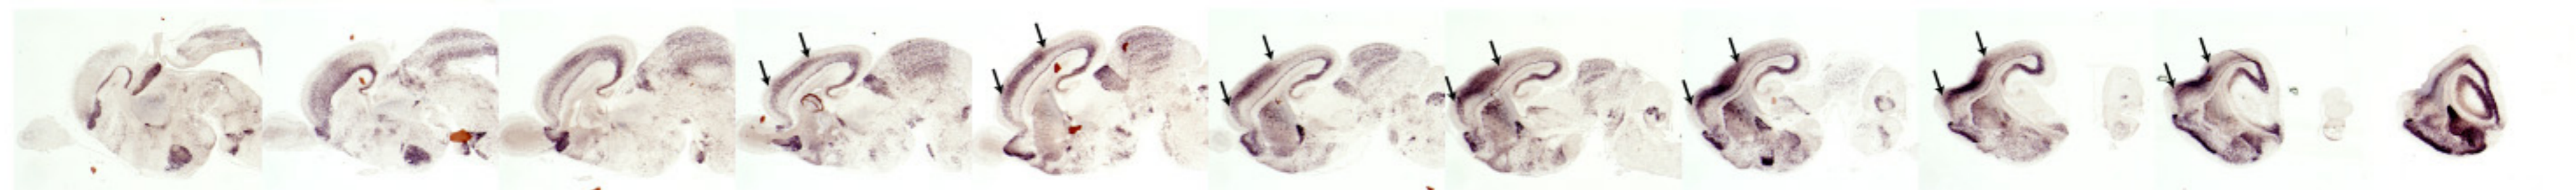

Supplement: pnas_0702225104_6.pdf [file pnas_0702225104_6.pdf]

**P40****BAC-EphA2 GFP****A****+/-**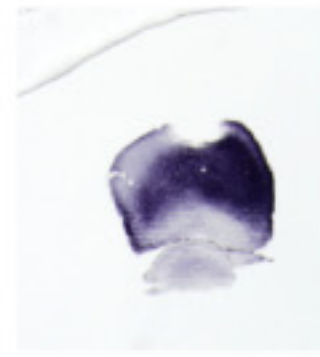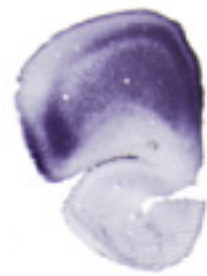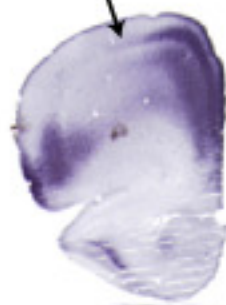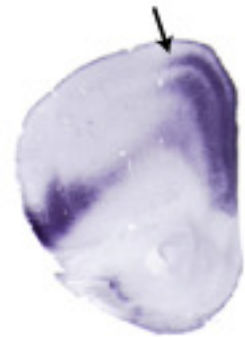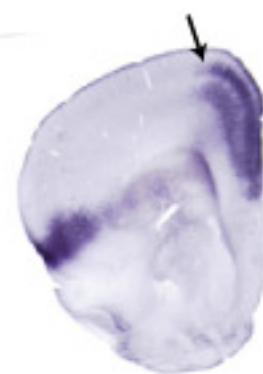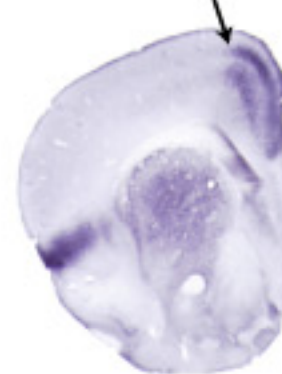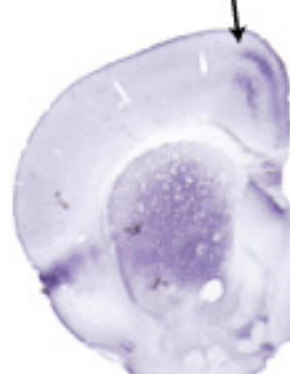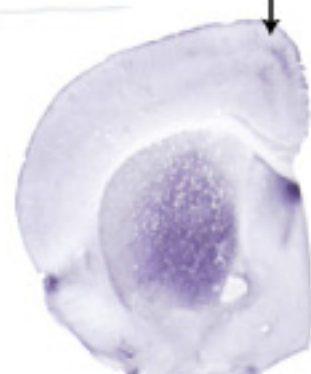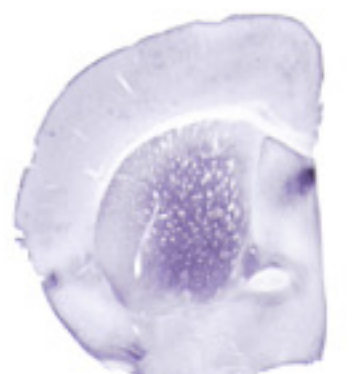**-/-**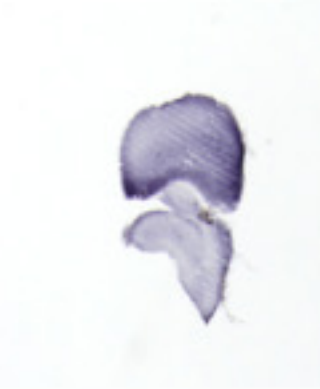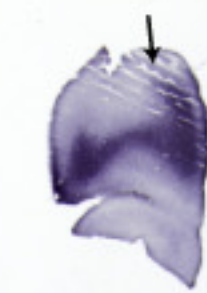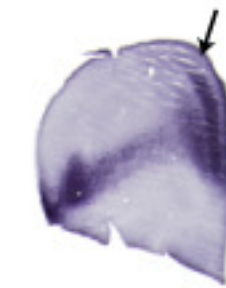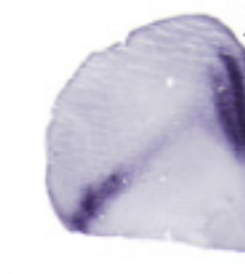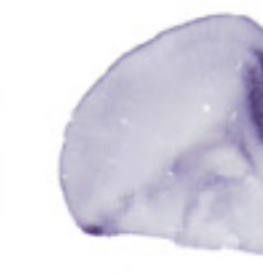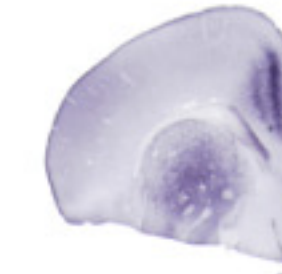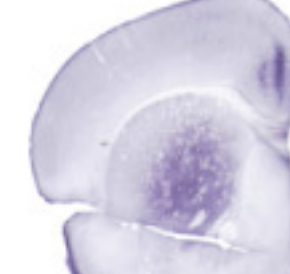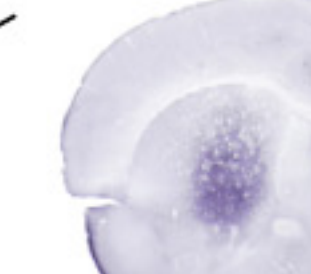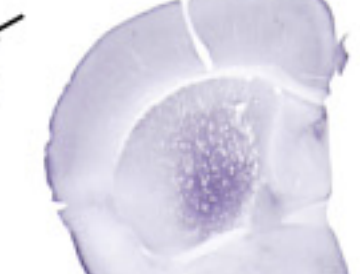**B****+/-**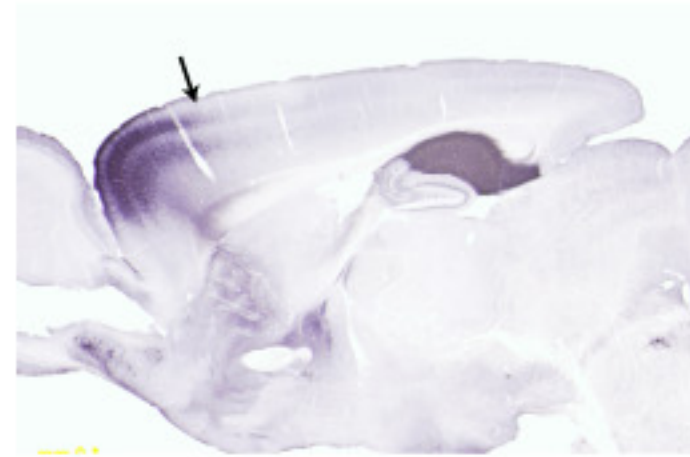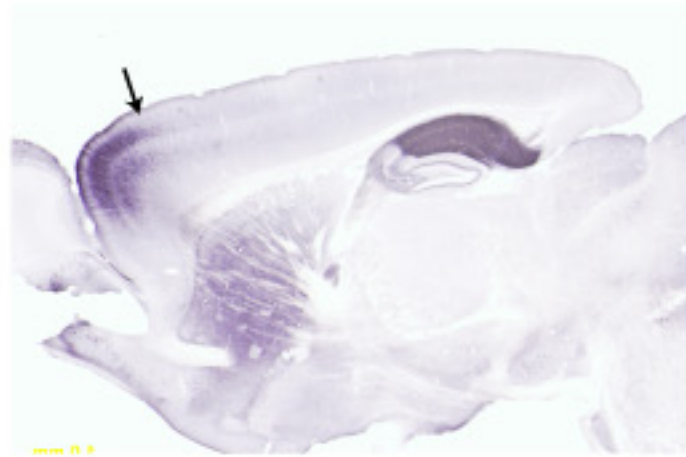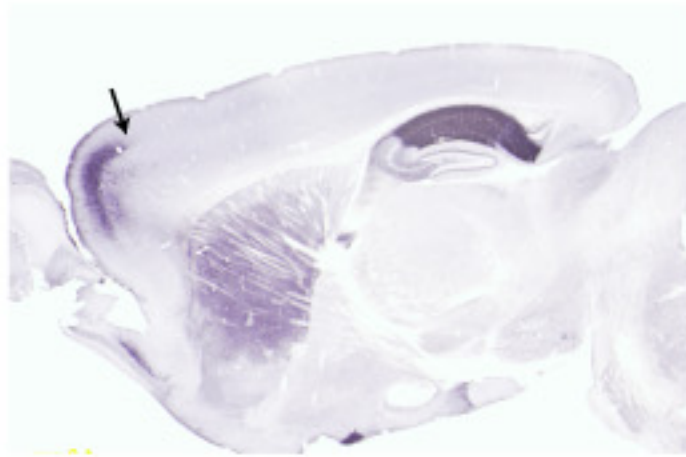**-/-**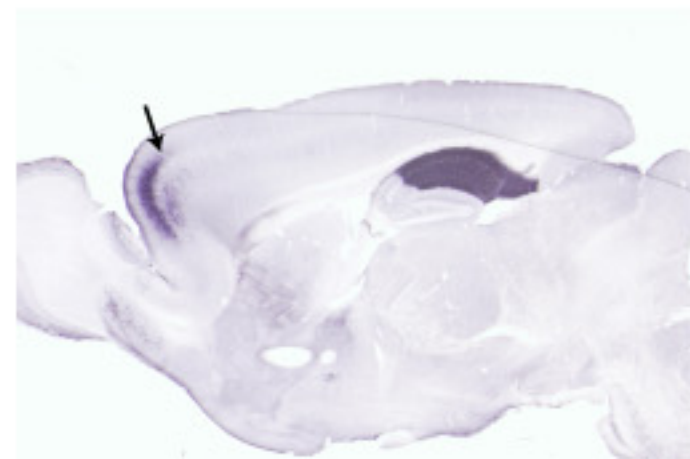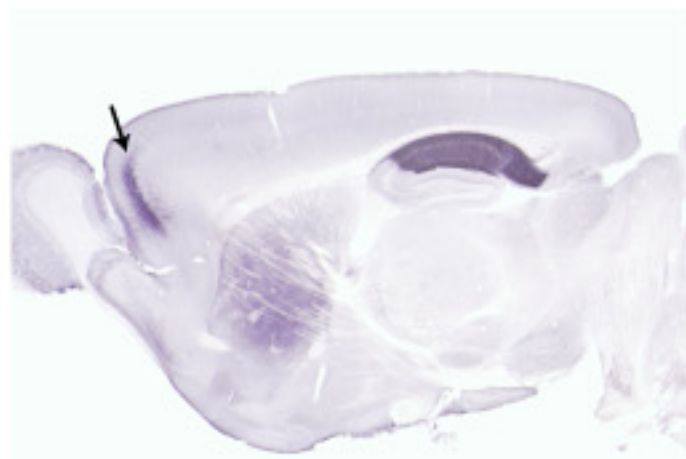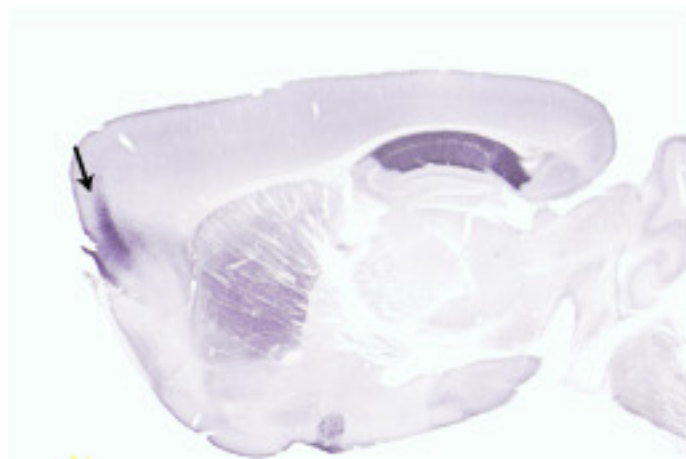

Supplement: pnas_0702225104_7.pdf [file pnas_0702225104_7.pdf]

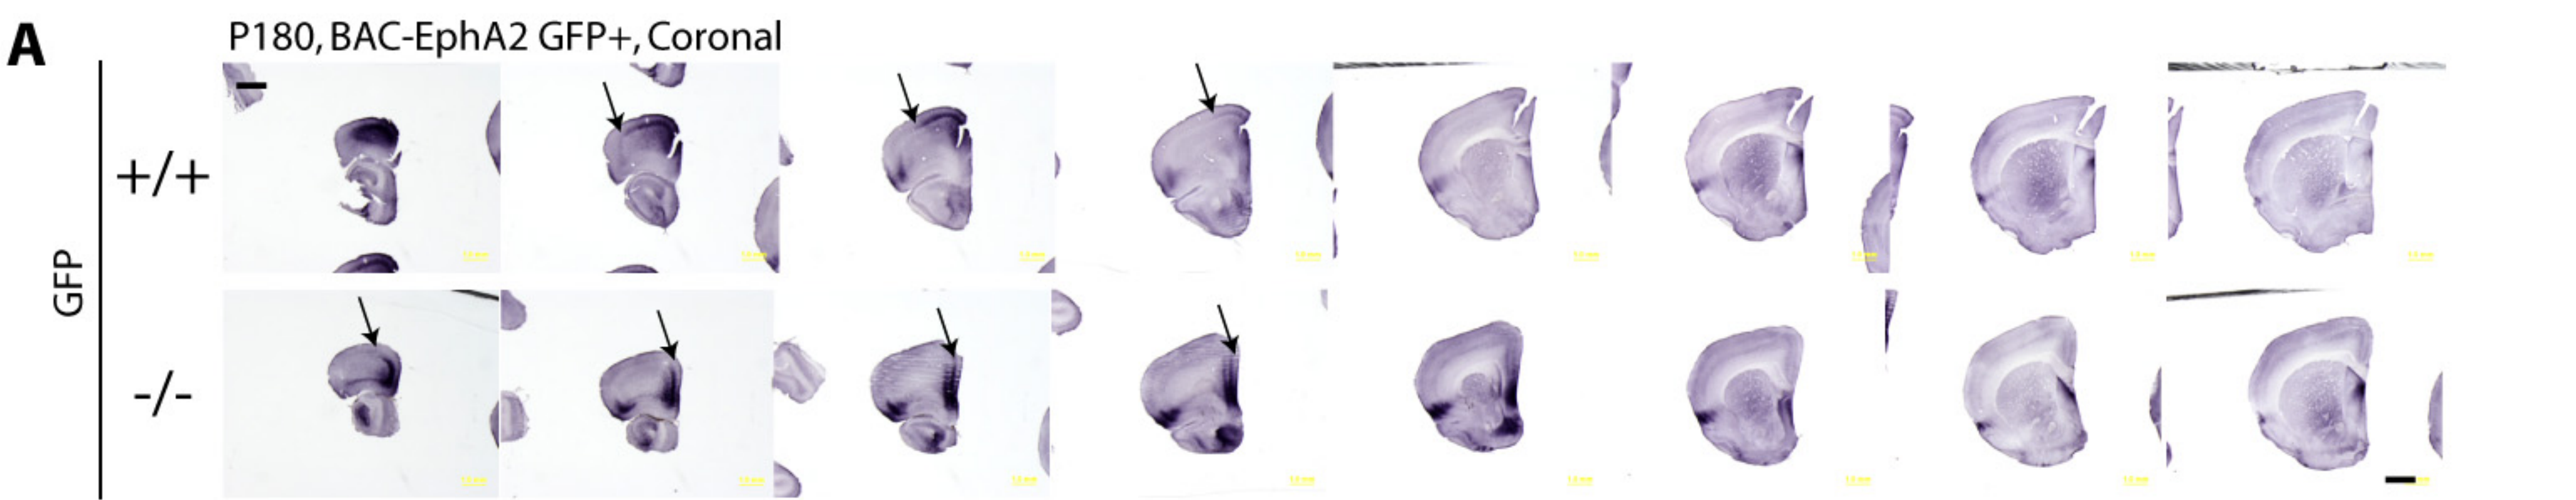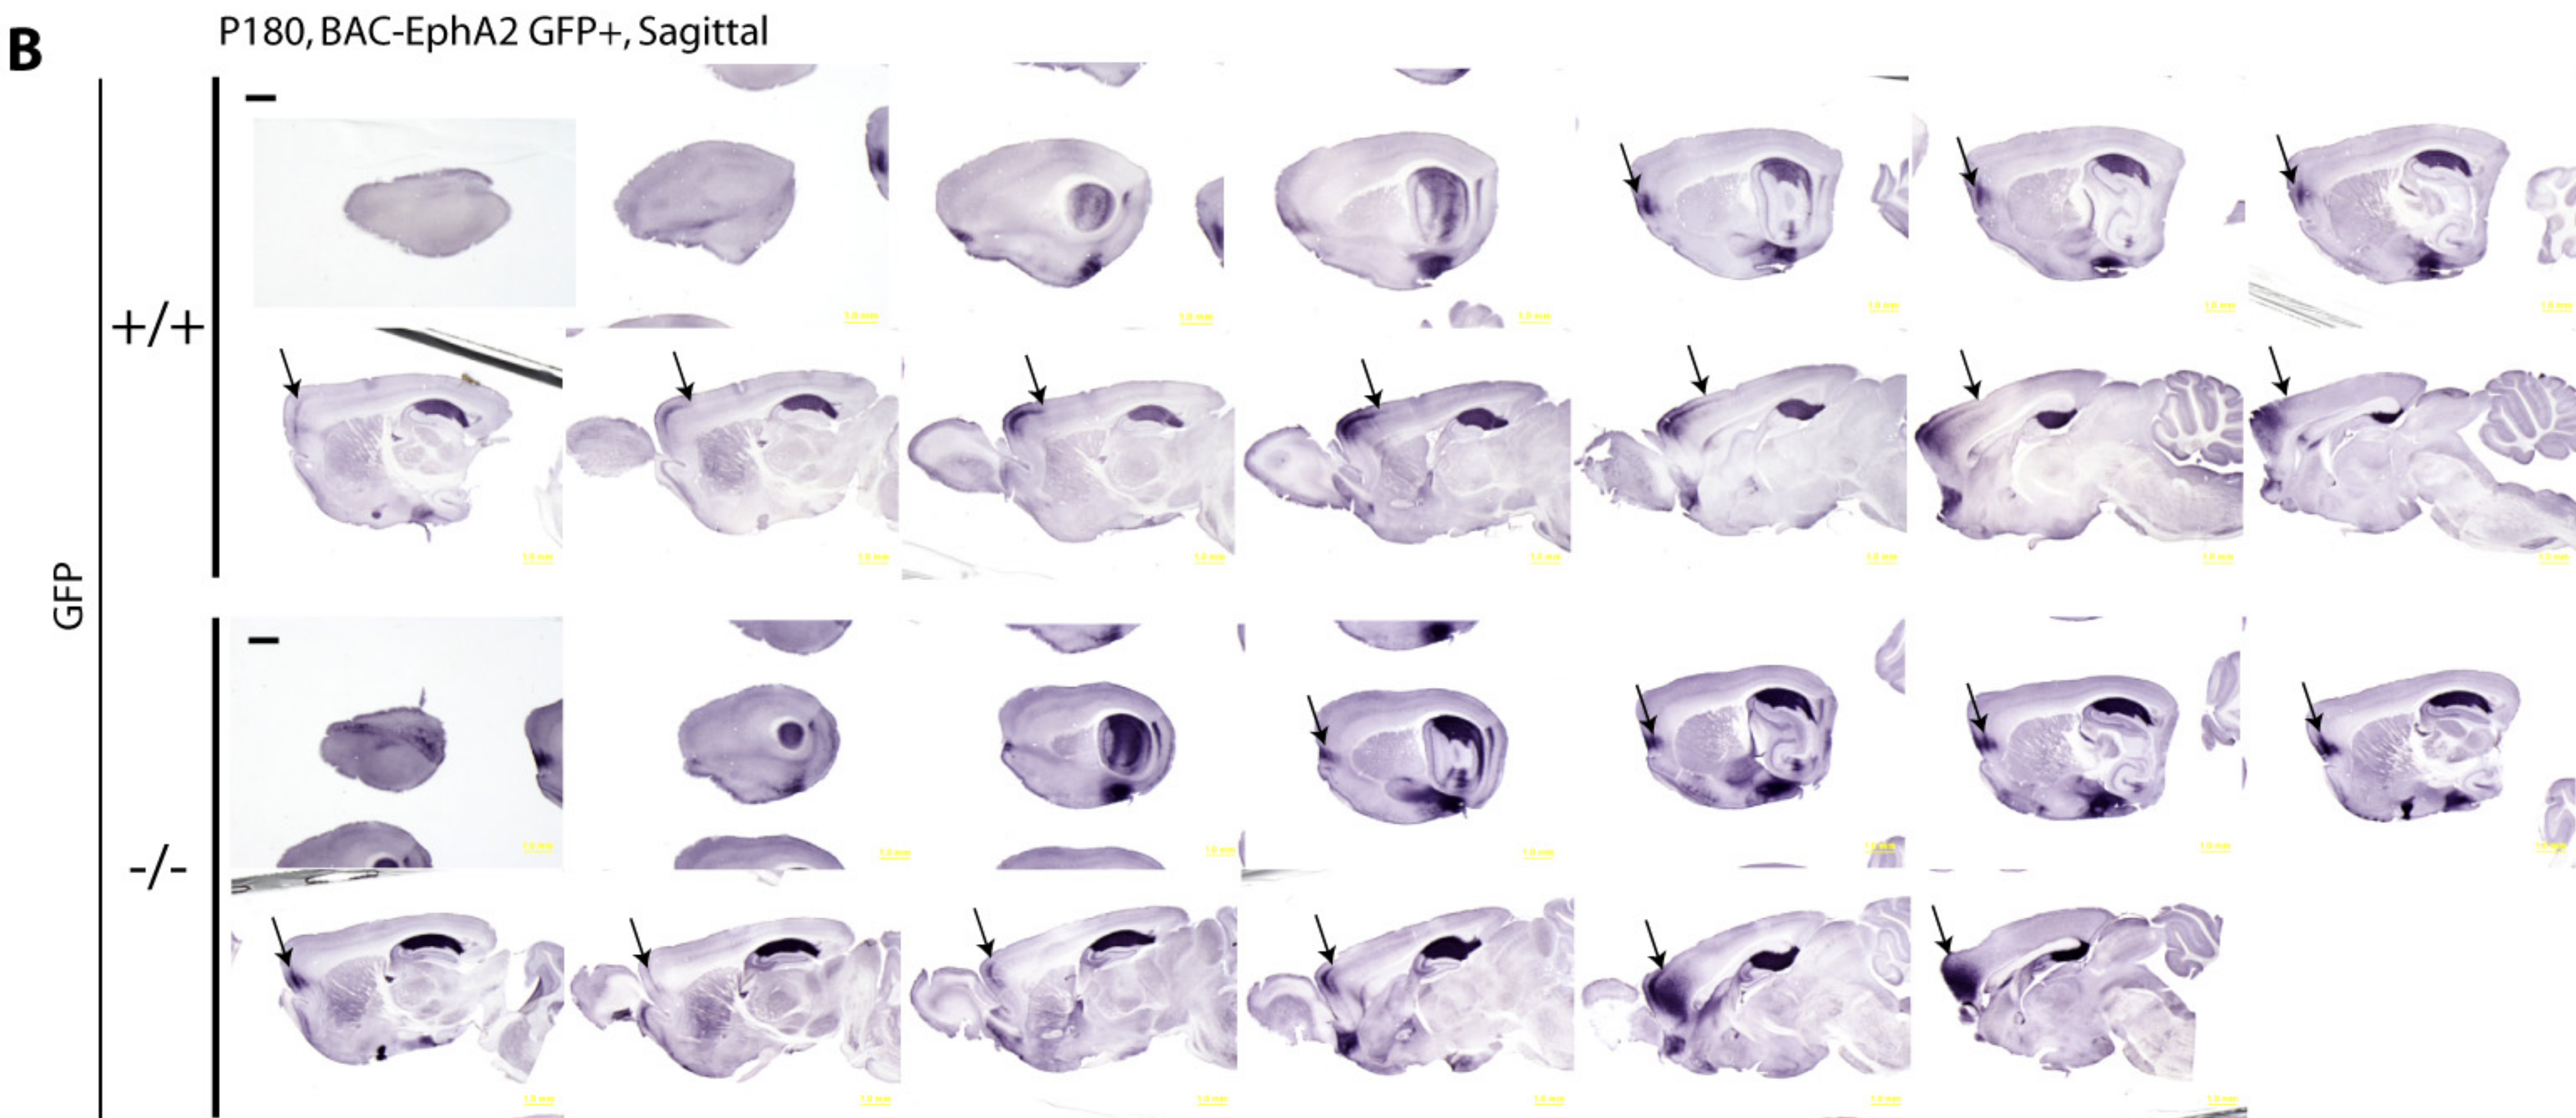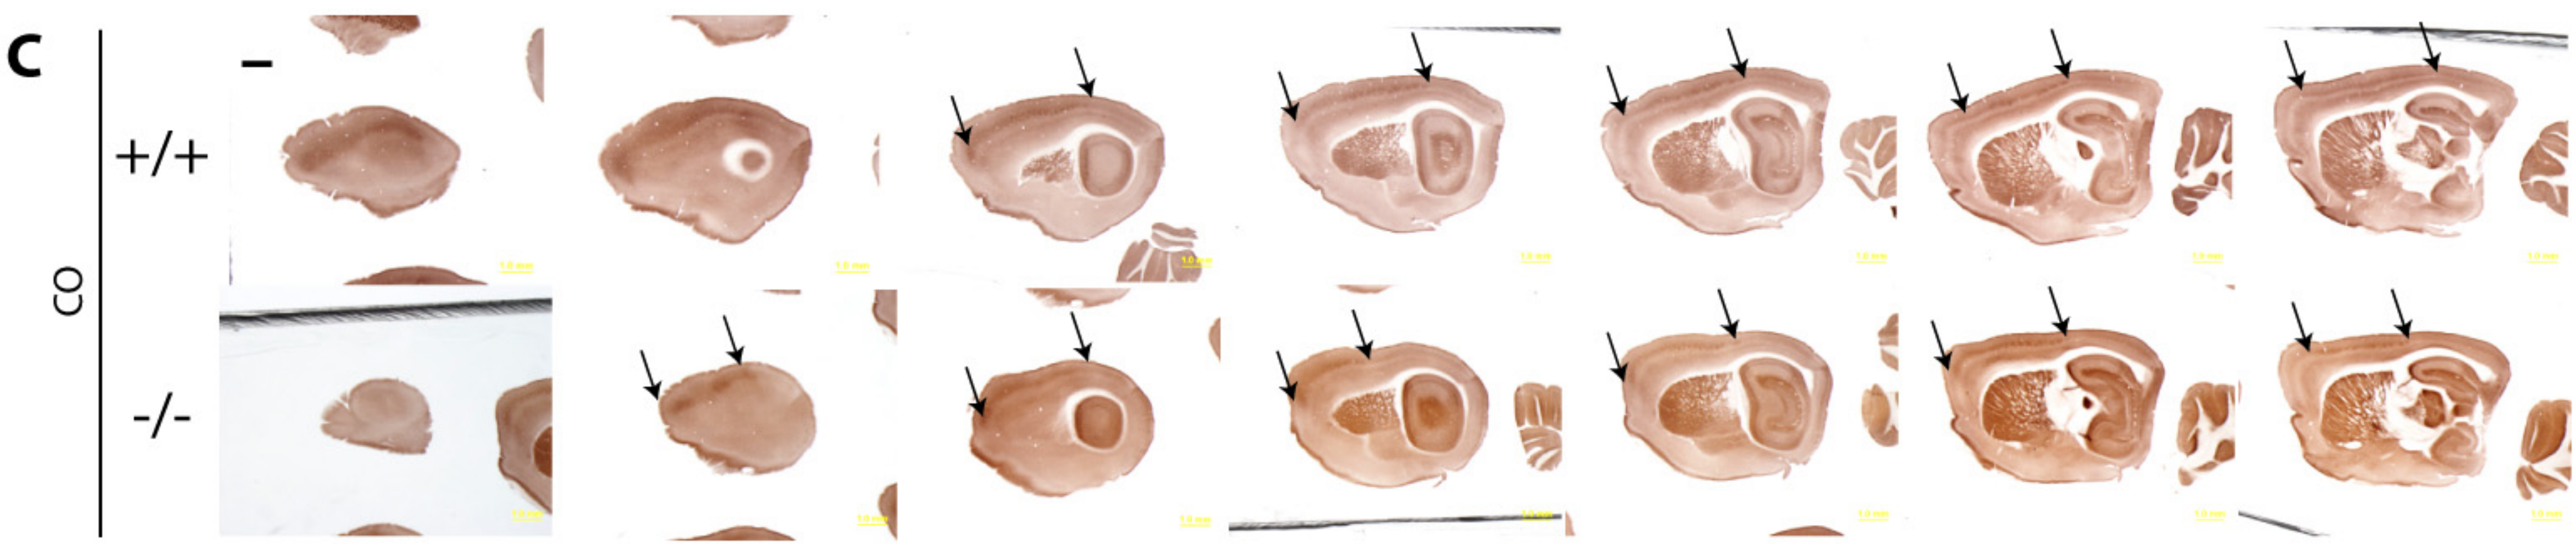

Supplement: pnas_0702225104_8.pdf [file pnas_0702225104_8.pdf]

**P0**

**Fgf17<sup>+/+</sup>; BAC-Drd4 GFP**

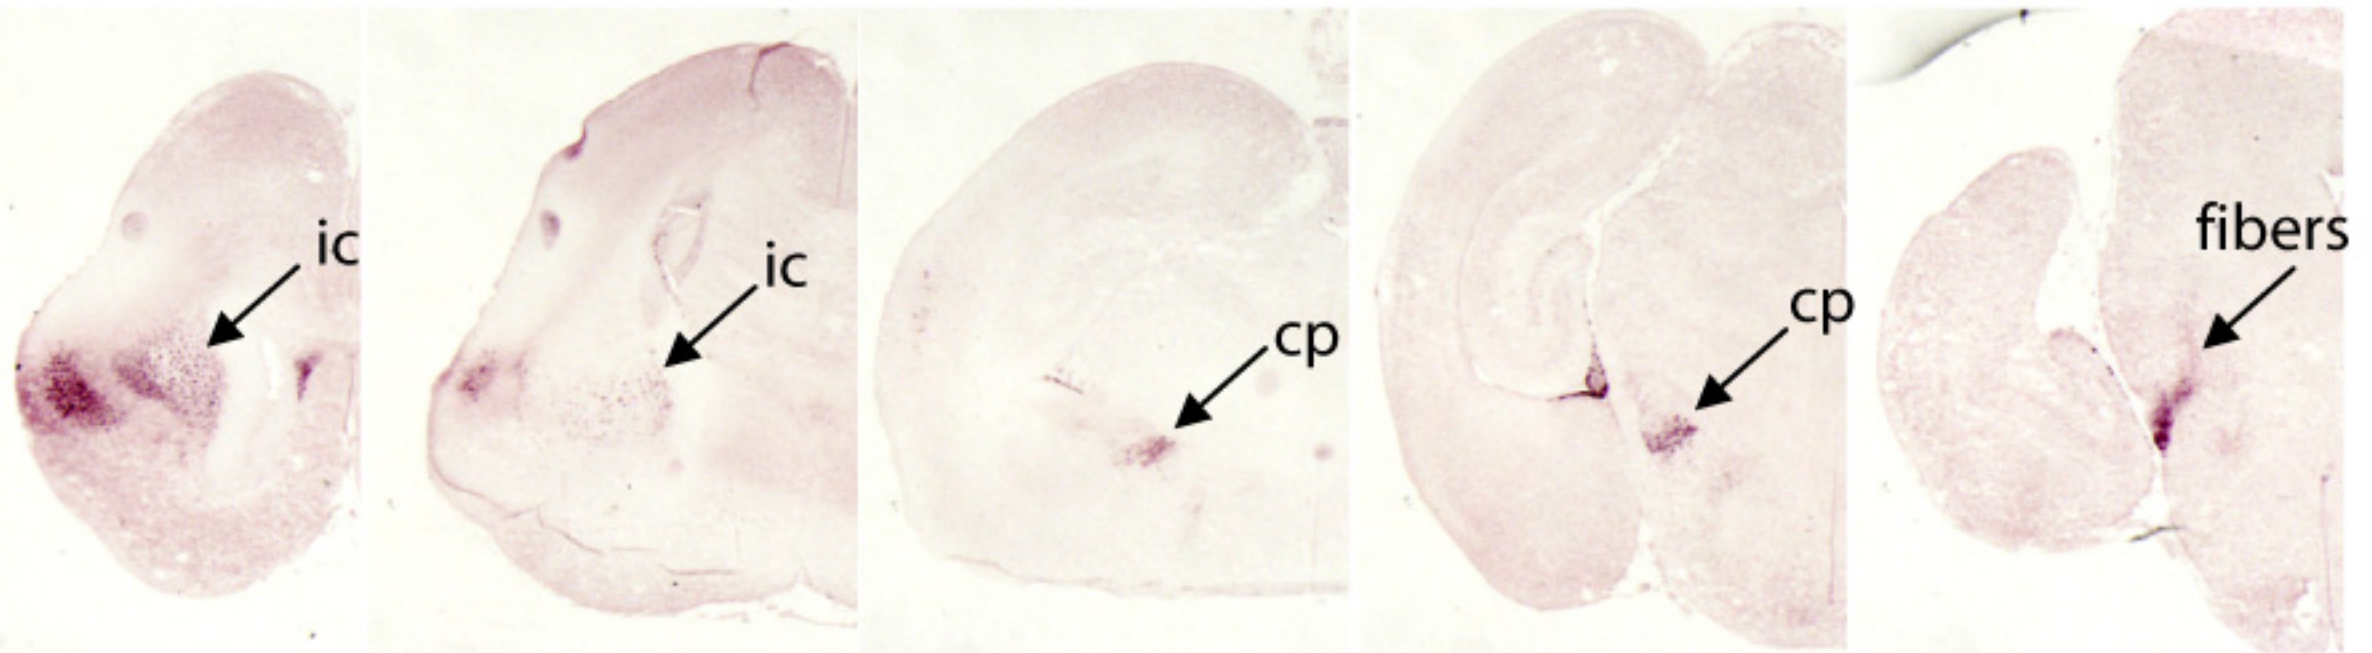

**Fgf17<sup>-/-</sup>; BAC-Drd4 GFP**

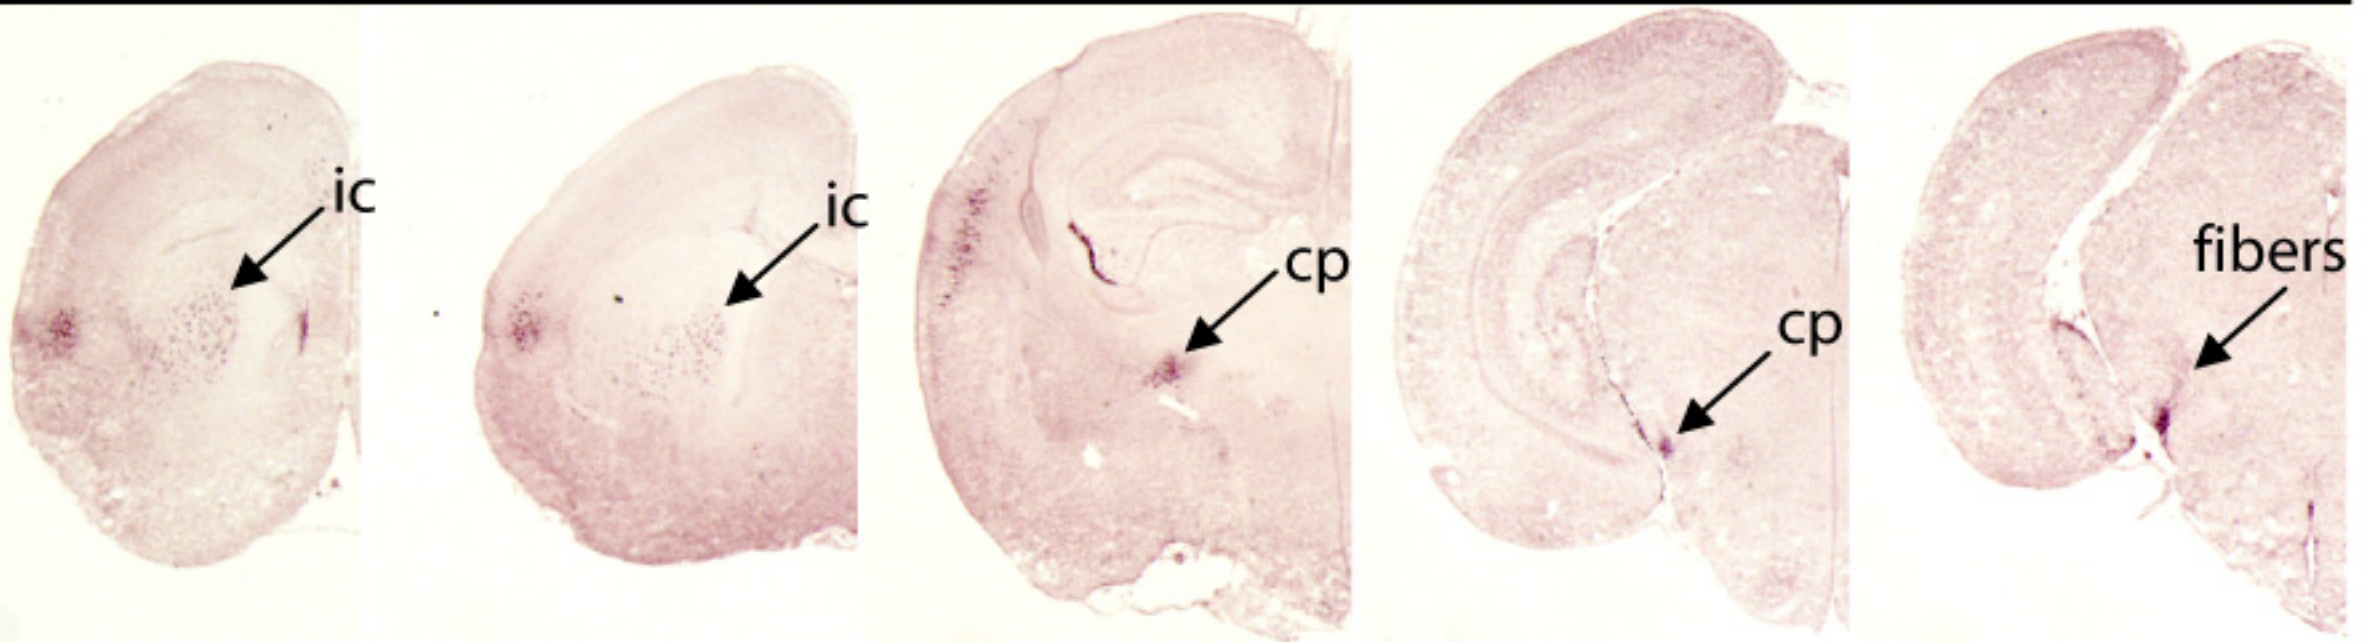

Supplement: pnas_0702225104_9.pdf [file pnas_0702225104_9.pdf]
